1 **Ovipositor and mouthparts in a fossil insect support a novel ecological role for early**  
2 **orthopterans in Pennsylvanian forests**

3

4 Lu Chen,<sup>1</sup> Jun-Jie Gu,<sup>2</sup> Qiang Yang,<sup>3</sup> Dong Ren,<sup>1\*</sup> Alexander Blanke,<sup>4#</sup> and Olivier  
5 Béthoux<sup>5#</sup>

6

7 <sup>1</sup>College of Life Sciences and Academy for Multidisciplinary Studies, Capital Normal  
8 University, 105 Xisanhuanbeilu, Haidian District, Beijing 100048, China

9

10 <sup>2</sup>Institute of Ecological Agriculture, College of Agronomy, Sichuan Agricultural  
11 University, Chengdu, Sichuan, 611130, China

12

13 <sup>3</sup>School of Life Sciences, Guangzhou University, 230 Waihuanxi Road, Guangzhou  
14 Higher Education Mega Center, Guangzhou 510006, China

15

16 <sup>4</sup>Institute of Evolutionary Biology and Animal Ecology, University of Bonn, An der  
17 Immenburg 1, 53121 Bonn, Germany

18

19 <sup>5</sup>CR2P (Centre de Recherche en Paléontologie – Paris), MNHN – CNRS – Sorbonne  
20 Université; Muséum National d’Histoire Naturelle, 57 rue Cuvier, CP 38, 75005 Paris,  
21 France

22

23 \*Correspondence: [rendong@mail.cnu.edu.cn](mailto:rendong@mail.cnu.edu.cn)

24

25 # joint senior authors

26

27

28 **ABSTRACT**

29 Lobeattid insects represented a high portion of the earliest known, Pennsylvanian  
30 insect faunas. However, their systematic affinities and their role as foliage feeders  
31 which severely influenced their ecosystems remain debated. We investigated hundreds  
32 of samples of a new lobeattid species from the Xiaheyan locality using Reflectance  
33 Transforming Imaging combined with geometric morphometrics in order to assess its  
34 morphology, infer its ecological role, and phylogenetic position. *Ctenoptilus frequens*  
35 sp. nov. possessed a sword-shaped ovipositor whose valves interlocked by two  
36 ball-and-socket mechanisms. This unambiguously supports lobeattids as  
37 stem-relatives of all Orthoptera (crickets, grasshoppers, katydids). Given the herein  
38 presented and other remains, it follows that this group experienced an early  
39 diversification coupled with high levels of abundance. The ovipositor shape  
40 additionally indicates that ground was the preferred substrate for eggs. Visible  
41 mouthparts made it possible to assess the efficiency of the mandibular food uptake  
42 system in comparison to a wide array of recent species. The new species was  
43 omnivorous which explains the paucity of external damage on contemporaneous plant  
44 foliage.

45

46

47 **INTRODUCTION**

48 The earliest known insect faunas in the Pennsylvanian, ca. 307 million years ago,  
49 were populated by species displaying mixtures of inherited (plesiomorphic) and  
50 derived (apomorphic) conditions, such as the griffenflies, but also by highly  
51 specialized groups, such as the gracile and sap-feeding megasecopterans. A prominent  
52 portion of this past insect fauna were the so-called ‘lobeattid insects’. They have been  
53 recovered from all major Pennsylvanian outcrops, where some species can abound  
54 (1-3). Indeed, at the Xiaheyan locality, China, for which quantitative data are  
55 available, they collectively account for more than half of all insect occurrences (4).  
56 Additionally, another extinct group - the order Cnemidolestodea - composed of  
57 derived relatives of lobeattid insects, was likewise ubiquitously distributed during the  
58 Pennsylvanian until the onset of the Permian (5).

59 The systematic affinities of this abundant fraction of the earliest insect faunas are  
60 debated. They have been regarded as stem-relatives of either Orthoptera (6) or of  
61 other lineages within Polyneoptera (7, 8). A core point of the debate is the presumed  
62 wing venation groundplan of insects, which, however, will remain elusive until  
63 Mississippian or even earlier fossil wings are discovered. Ecological preferences of  
64 lobeattid insects are also poorly known. They have been traditionally regarded as  
65 foliage feeders (9) but, given their abundance, this stands in contrast to the paucity of  
66 documented foliage external damage during that time.

67 The Xiaheyan locality is unique in several respects (4), including the amount of  
68 insect material it contains. Over the past decade a collection of several thousand  
69 specimens was unearthed, allowing for highly detailed analyses of e.g. ovipositor and

70 mouthparts morphology of extinct insect orders (10). These character systems are  
71 investigated herein in a new lobeattid species, documented based on an abundant  
72 material using Reflectance Transforming Imaging (RTI). Dietary preferences were  
73 inferred based on a comparative geometric morphometric analysis relying on an  
74 extensive dataset of extant polyneopteran species, with a focus on Orthoptera.  
75 Together, this investigation provides decisive information regarding the dietary niche  
76 of lobeattid insects and their phylogenetic affinities.

77

## 78 RESULTS

79

### 80 Systematic Palaeontology

81 Archaeorthoptera Béthoux and Nel, 2002

82 Ctenoptilidae Aristov, 2014

83 *Ctenoptilus* Lameere, 1917

84 *Ctenoptilus frequens* Chen, Gu & Béthoux, sp. nov.

85 **LSID (Life Science Identifier).** xxxx

86 **Etymology.** Based on ‘*frequens*’ (‘frequent’ in Latin), referring to the abundance  
87 of the species at the Xiaheyuan locality.

88 **Holotype.** Specimen CNU-NX1-326 (female individual; Fig. 1).

89 **Referred material.** See Supplemental Text section 2.1.2.

90 **Locality and horizon.** Xiaheyuan Village, Zhongwei City, Yanghugou Formation  
91 (Ningxia Hui Autonomous Region, China); latest Bashkirian (latest Duckmantian) to  
92 middle Moscovian (Bolsovian), early Pennsylvanian (4).

93 **Differential diagnosis.** The species is largely similar to *Ctenoptilus elongatus*  
94 (Brongniart, 1893), in particular in its wing venation (Supplemental Text section  
95 2.1.2). However, it differs from it in its smaller size (deduced from forewing length)  
96 and its prothorax longer than wide (as opposed to quadrangular).

97 **General description.** See Supplemental Text section 2.1.2.

98 **Specimens description.** See Supplemental Text section 2.1 and figs. S2–S8;  
99 details of ovipositor, see Fig. 2; details of head, see Fig. 3.

100

### 101 Ovipositor morphology

102 The external genitalia in insects consist primarily of a pair of mesal extensions, the  
103 so-called *gonapophyses*, or ovipositor blades, and a pair of lateral projections, the  
104 so-called gonostyli, or ovipositor sheaths on abdominal segments 8 and 9. These  
105 sclerotized elements are collectively referred to as ‘valves’. The studied fossils  
106 possess three pairs of valves in their ovipositor, each strongly sclerotized (Fig. 2A–D,  
107 and figs. S7B and C and S8B and C). Especially the valve margins are still visible in  
108 the anterior area (‘base’), including the dorsal margin of the gonostylus 9 (gs9), the  
109 ventral margin of the gonapophysis 9 (gp9), and the dorsal and ventral margins of  
110 gonapophysis 8 (gp8). All observed ovipositors, but in particular the one of specimen  
111 CNU-NX1-742 (Fig. 2C and D, and fig. S8B and C), display, from the second third of

112 their length onwards, a thin longitudinal line much sharper and more developed than  
113 other visible linear structures in the area. This is the primary olistheter (olis1), a  
114 tongue like structure which commonly interlocks gp9 and gp8 in extant insects having  
115 more or less well-developed external ovipositors (Fig. 2G) (11). In the distal half of  
116 the ovipositor, the linear structure occurring between the dorsal edge of gs9 and olis1  
117 is interpreted as the dorsal margin of gp9.

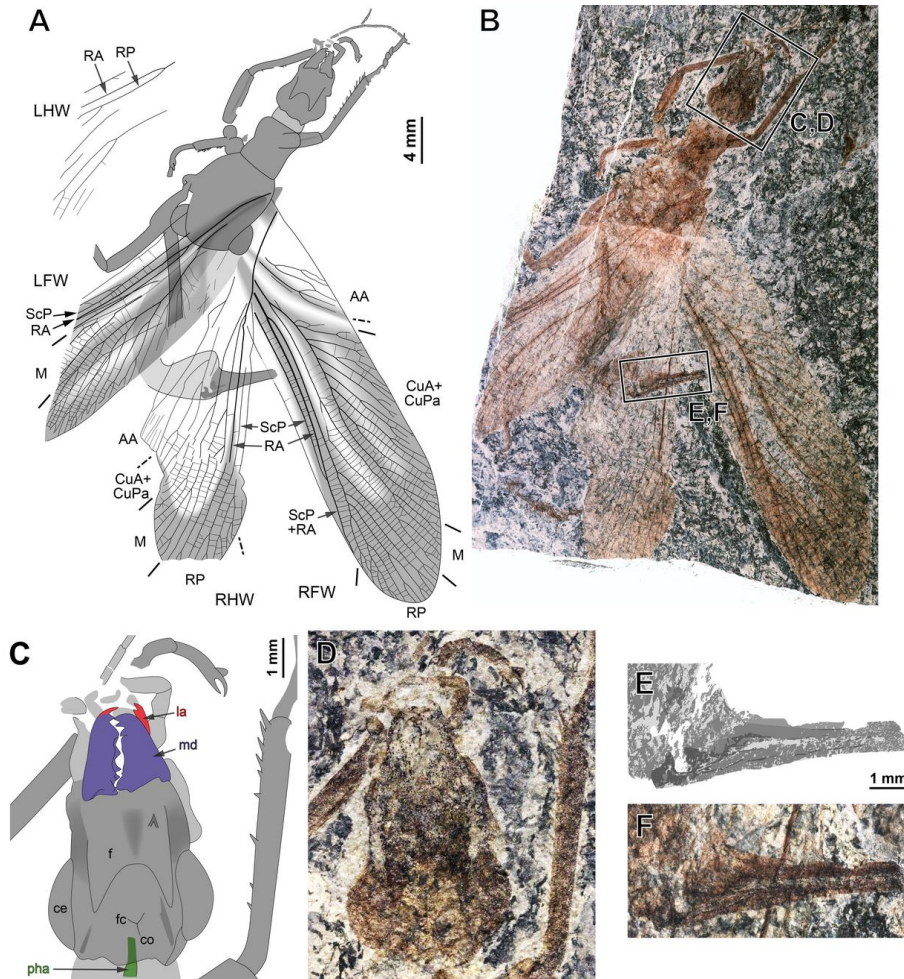

118  
119 **Figure 1** *Ctenoptilus frequens* sp. nov., holotype (CNU-NX1-326). (A) habitus drawing and (B) habitus  
120 photograph (composite); (C–D) details of head and right foreleg (location as indicated in B), (C) color-coded  
121 interpretative drawing and (D) photograph (composite); and (E–F) details of ovipositor (location as  
122 indicated in B), (E) drawing and (F) photograph (composite). Color-coding and associated abbreviations:  
123 red, lacina (la); dark blue-purple, mandible (md); green, pharynx (pha). Other indications, head: ce,  
124 composite eye; f, frons; co, coronal cleavage line; fc, frontal cleavage line. Wing morphology abbreviations:  
125 LFW, left forewing; LHW, left hind wing; RFW, right forewing; RHW, right hind wing; ScP, posterior  
126 Subcosta; RA, anterior Radius; RP, posterior Radius; M, Media; CuA, anterior Cubitus; CuPa, anterior  
127 branch of posterior Cubitus; CuPb, posterior branch of posterior Cubitus; AA, anterior Analis.

128 Together with the position of the antero-basal apophysis (=outgrowth) of this valve,  
129 the anterior margin of gp9 can then be traced. The extent of olis1 indicates that gp9  
130 reaches the ovipositor apex, which is corroborated by the length of its inferred dorsal  
131 margin, well visible in specimen CNU-NX1-749 (Fig. 2A and B, and fig. S7B and C).

132 This specimen also shows that gp8 bears ventrally-oriented teeth, more prominent and  
133 densely distributed near the apex similar to recent orthopterans (Fig. 2). The location  
134 of the dorsal margin of gp9 could not be observed with confidence near the base,  
135 which might be due to a lower degree of sclerotization.

136 This morphology implies that, at the base, dorsal to the anterior margin of gp8,  
137 only gs9 and gp9 occur. Therefore, the sharp and heavily sclerotized longitudinal line,  
138 located slightly dorsally with respect to the ventral margin of gs9, can only be an  
139 olisthete interlocking these two valves (olis2). This second olisthete reaches olis1  
140 but its development beyond this point could not be inferred with the available material.  
141 The occurrence of a mechanism locking gs9 onto gp9 is further supported by the fact  
142 that these valves remained connected to each other in the specimen CNU-NX1-742  
143 even though it endured heavy decay (head and ovipositor detached from thorax and  
144 abdomen, respectively; fig. S8). The ovipositor configuration in *Ct. elongatus*  
145 conforms the one assumed for the Orthoptera groundplan, as exemplified by extant  
146 Raphidophoridae (Fig. 2E and F, and see Fig. G; and Supplemental Text section 2.2)  
147 in which a second olisthete occurs in addition to olis1 and interlocks gs9 and gp9.



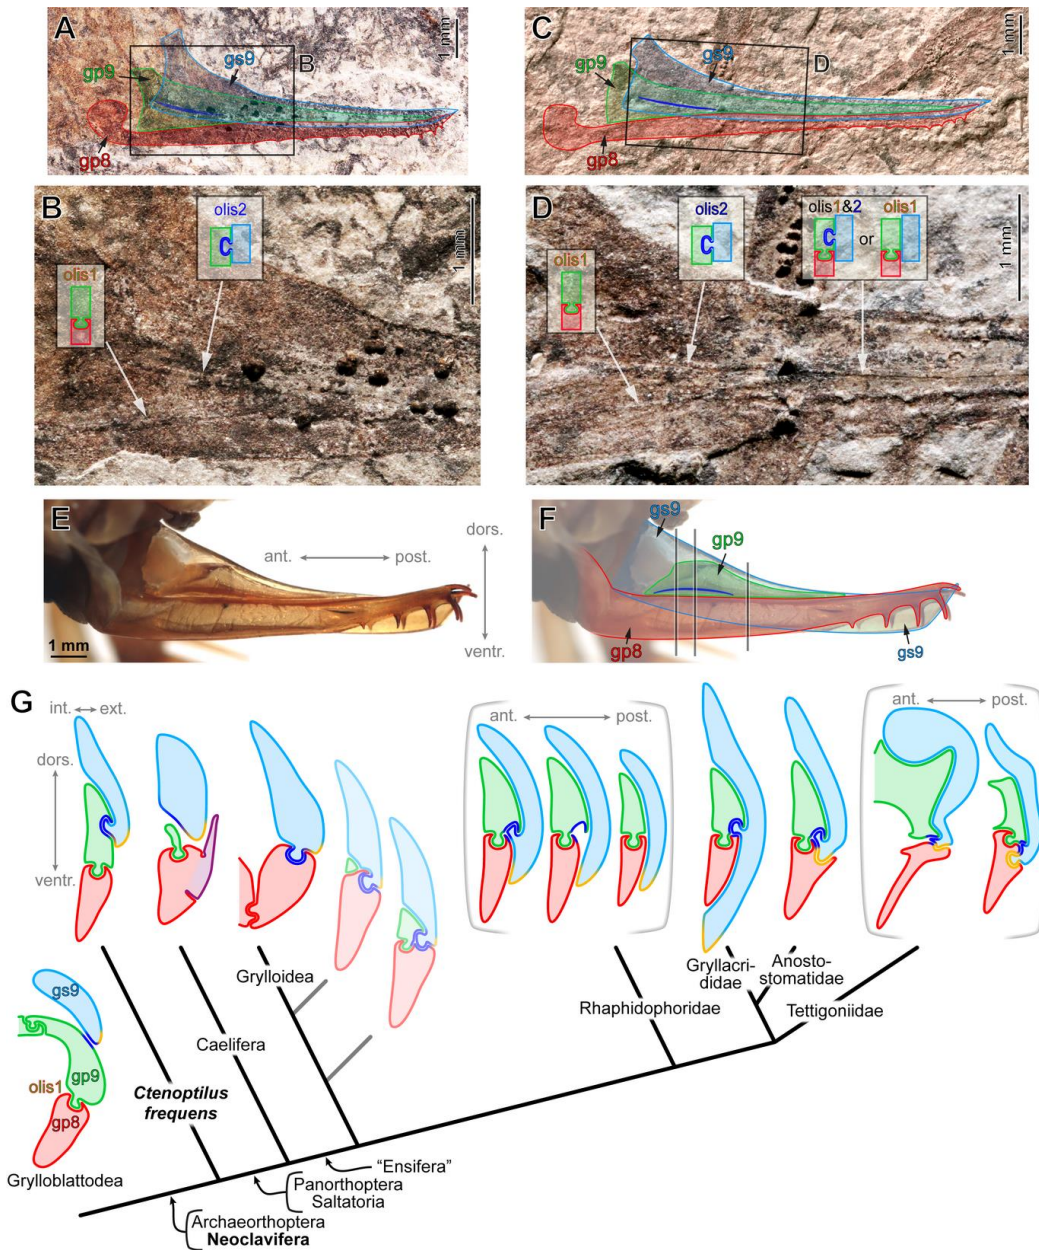

148

149 **Figure 2** External ovipositor in lateral view, (A–D) *Ctenoptilus frequens* sp. nov. and (E–F) *Ceuthophilus* sp.

150 (Orthoptera: Rhaphidophoridae; extant), and (G) ovipositor cross-sections in Grylloblattodea, *Ctenoptilus*

151 *frequens* sp. nov. and a selection of extant Orthoptera possessing well-developed ovipositors (schemes, left

152 side, not to scale; and see Supplemental Text section 2.2), mapped onto a consensual phylogeny. (A–B)

153 specimen CNU-NX1-749, (A) overview with interpretation (and see Figure S7A–C) and (B) detail of base as

154 located on A; (C–D) specimen CNU-NX1-742, (C) overview with interpretation (and see Figure S8) and (D)

155 detail of base as located on C; (E) General view (left side, flipped horizontally, left gs9 removed) and (F) the

156 same, annotated (the three black vertical lines indicate the position of the three schematic sections

157 represented in G, Rhaphidophoridae); (G) pale cross-sections along the stem of Grylloidea hypothetical;

158 sections delineated by brackets represent conditions along the antero-posterior axis of a single type.

159 Color-coding and associated abbreviations: light blue, gonostylus IX (gs9); light green, gonapophysis IX

160 (gp9); red, gonapophysis VIII (gp8); royal blue, secondary olistheter (olis2); light orange, tertiary olistheter

161 (olis3); purple, ‘lateral basalvalvular sclerite’ (specific to Caelifera). Other indications: olis1, primary

162 *olistheter*; int./ext., internal/external, respectively; dors./ventr., dorsal/ventral, respectively; and ant./post.,  
163 anterior/posterior, respectively.

164

### 165 **Mandibular mechanical advantage**

166 The head and mouthpart morphology could be investigated in more detail in six  
167 specimens (see supplementary text) while we could study the mechanical advantage  
168 (MA; see section 1.4 of the supplementary text) of their mandibles in four of the six  
169 (viz. CNU-NX1-326, -747, -754, -764). The MA is defined as the inlever to outlever  
170 ratio and thus indicates the percentage of force transmitted to the food item (i.e. the  
171 effectivity of the lever system). Therefore, the MA allows for a size independent  
172 comparison of the relative efficiencies of force transmission to the food item. Low  
173 MA values usually indicate quick biting with low force transmission typical for  
174 predators, while high MA values indicate comparatively slow biting with higher force  
175 transmission typical for non-predatory species.

176 Calculation of the mechanical advantage along the entire gnathal edge revealed  
177 characteristic MA curve progressions for the studied taxa (Supplemental Text section  
178 2.3, and fig. S9). Compared to the studied fossils, recent Dermaptera, Embioptera, and  
179 Phasmatodea showed comparatively high MAs with an almost linear curve  
180 progression towards more distal parts of the mandibular incisivi whereas Plecoptera,  
181 Zoraptera, and Grylloblattodea were located at the lower end of the MA range with a  
182 gently exponential decrease towards the distal incisivi. The analysed extant  
183 Orthoptera occupy a comparatively wide functional space, with lineages at the higher  
184 and lower end of the MA range. The composite fossil mandible representation (CFMR)  
185 of *Ct. frequens* (see Methods) is located in the centre of the observed range of MAs  
186 for Orthoptera (Fig. 3).

187 A polynomial function of the fifth order resulted in the best relative fit on the MA  
188 curves according to the AIC value (-661.3, see Methods). The five common  
189 coefficients were subjected to a principal component analysis (PCA, Fig. 3E), and,  
190 because phylogenetic signal was detected ( $K = 1.03316$ ;  $p = 0.0001$ ), also analysed  
191 using a phylogenetic principal component analysis (pPCA) (Supplemental Text  
192 section 2.3, and fig. S10). The first four principal components (PCs) accounted for  
193 96.8% (PCA) / 96% (pPCA) of the variation in MA (tab. S3).

194 In both PCAs, PC1 mainly codes for the vertical position of the MA curve, i.e.  
195 the effectivity of the force transmission along the whole toothrow, while PC2 mainly  
196 codes for the curvature, i.e. whether there is an almost linear or a gently exponential  
197 decrease in the effectivity of force transmission. Due to the narrow distribution of  
198 species along PC3 it was not possible to associate a clear biomechanical pattern to this  
199 PC.

200 The CFMR of *Ct. frequens* is located at the centre of the first three PCs (Fig. 3E).  
201 Omnivorous Orthoptera and all herbivore taxa, with the exception of *Apotrechus*, are  
202 located along the width of PC1, while there is a tendency for the carnivorous taxa

203 within the sampling to be spread along PC2.  
 204

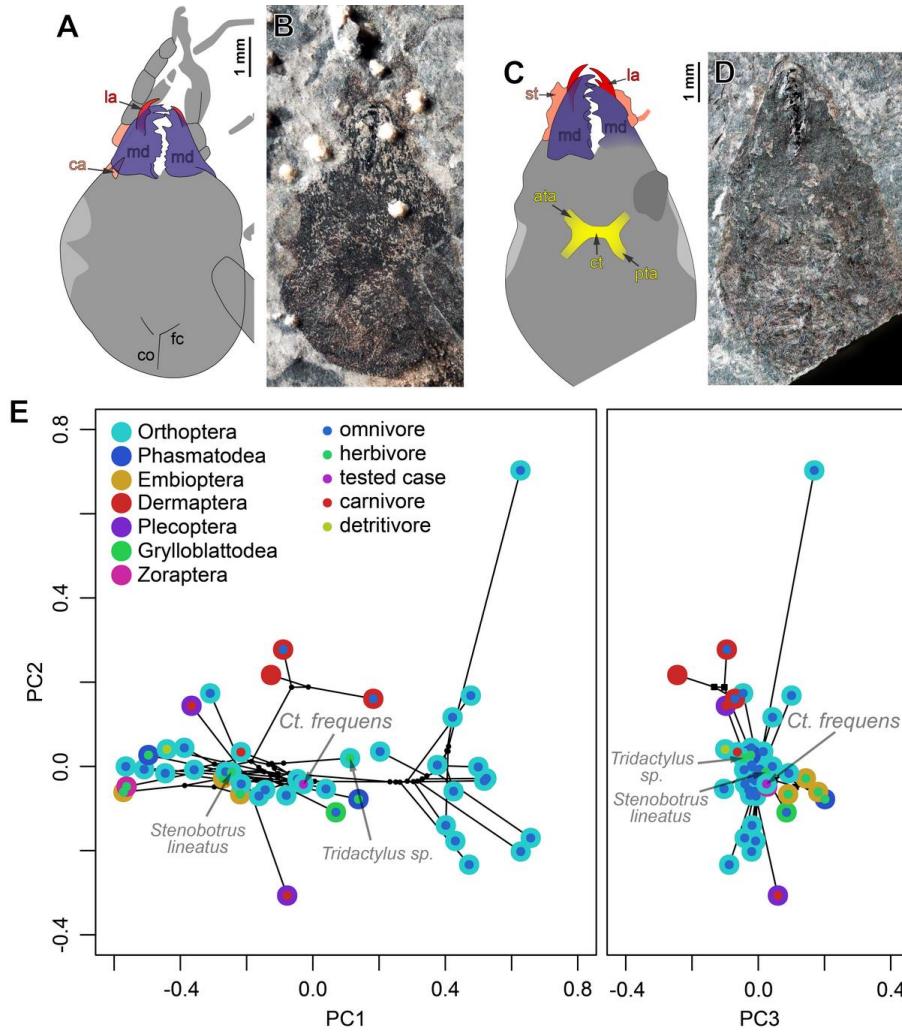

205  
 206 **Figure 3** Head morphology (A–D) in *Ctenoptilus frequens* sp. nov. and (E) mandibular mechanical  
 207 advantage in *Ctenoptilus frequens* sp. nov. and a selection of polyneopteran species. (A–B) Specimen  
 208 CNU-NX1-754, (D) color-coded interpretative drawing and (E) photograph (composite) (as located on  
 209 Figure S7I); (C–D) Specimen CNU-NX1-764, (D) color-coded interpretative drawing and (E) photograph  
 210 (composite); (E) Principal component analysis of the mandibular mechanical advantage. Color-coding: (A–  
 211 D) red, lacina (la); salmon, cardinal and stipital sclerites (ca and st, respectively); dark blue-purple,  
 212 mandible (md); yellow, tentorium, including anterior tentorial arm (ata), posterior tentorial arm (pta) and  
 213 corpotentorium (ct). Other indications: co, coronal cleavage line; fc, frontal cleavage line.

214

215

## 216 DISCUSSION

217

### 218 Ovipositor morphology and phylogeny

219 Our analysis of material of *Ct. frequens* provides unequivocal evidence that an  
 220 *olis2* occurs in this species. Therefore, the new species was an orthopteran. Owing to  
 221 the lack of jump-related specialisation in the hind leg, the species can be excluded



222 from Saltatoria. Due to its wing morphology, with a CuPa vein lacking a fork basal to  
223 its fusion with the CuA vein, the new species can also be excluded from the  
224 Panorthoptera. It follows that *Ct. frequens*, and its various Pennsylvanian relatives  
225 collectively referred to as ‘lobeatid insects’, are stem-relatives of Orthoptera (Fig.  
226 2G).

227 The organizational diversity of elements which form the external ovipositor in  
228 Orthoptera made it difficult to reconstruct its evolution based on extant species only  
229 (12-16; Supplemental Text section 2.2). Comparison has traditionally been made  
230 between Grylloblattodea (rock-crawlers) and Orthoptera (15) even though the two  
231 groups are not closely related. In both groups the ovipositor displays an elongate  
232 gonostylus IX (gs9) and a ball-and-socket locking mechanism, the so-called primary  
233 olisthether (olis1), interlocking gonapophyses IX onto gonapophyses VIII (gp9 and gp8,  
234 respectively; Fig. 2G). This primary olisthether occurs widely among insects (11).  
235 Orthoptera possess a variety of additional olisthetes, including one interlocking gs9  
236 onto gp9 (royal blue in Fig. 2; olis2), as exemplified by Rhabdophoridae (cave  
237 crickets; Fig. 2E and F) and Gryllacrididae (raspy & king crickets). The occurrence of  
238 an olis2 is diagnostic of ensiferan (‘sword-bearing’) Orthoptera (14; and see below).

239 Even though it is unclear how far posteriorly olis2 extends in *Ct. frequens*, the  
240 asserted phylogenetic placement of this species provides new insights on the  
241 evolution of ovipositor interlocking mechanisms in Orthoptera (14; Fig. 2G). The  
242 ovipositor interlocking mechanisms is comparable to the one of Rhabdophoridae,  
243 the main differences concern the rachis (‘ball’ as in ‘ball-and-socket’), which is  
244 limited to a short protrusion in these insects, while the aulax (‘socket’ as in  
245 ‘ball-and-socket’) extends further posteriorly. In addition, gs9 extends more ventrally,  
246 concealing gp8 for some distance. Compared to Gryllacrididae the only notable  
247 difference in *Ct. frequens* is the ventral extension of gs9 in the former. In  
248 Anostomatidae the ventral margin of gs9 enters a socket in gp8, regarded as  
249 composing the premises of a third olisthether (olis3). This new structure ultimately  
250 replaces olis2 in Tettigoniidae and allows a coupling of gs9 with gp8.

251 Grylloidea (true crickets) and *Ct. frequens* are separated by more severe  
252 morphological differences. In the former, gp9 is reduced or even absent, and an  
253 olisthether connects gs9 and gp8.

254 Unlike other orthopterans displaying a well-developed external ovipositor,  
255 Caelifera (grasshoppers) use valves for digging a tunnel to accommodate their entire  
256 abdomen and, additionally, dig egg pods (17-19). The shoving operation to move  
257 forward is accomplished by powerful, rhythmic, dorso-ventral openings and closings  
258 of two sets of valves (16), gs9 and gp8+gp9, the two latter ones being interlocked via  
259 olis1. Even though gp9 is often reduced, it plays an important role in the closing of  
260 the ovipositor via muscles attached to it (16). Obviously, an olisthether interlocking gs9  
261 and gp8 (i.e. olis2) would impede such movements. Given the ovipositor  
262 configuration and phylogenetic placement of *Ct. frequens*, it follows that the olis2 was  
263 lost in Caelifera, a likely consequence of their highly derived oviposition technique.

264 The evolutionary scenario resulting from our findings in *Ct. frequens* addresses a  
265 long-standing debate on the respective position of the two sub-orders of Orthoptera,  
266 Ensifera and Caelifera. On the basis of early, fossil Saltatoria displaying elongate  
267 ovipositors, palaeontologists already assumed that caeliferans derived from ensiferans  
268 (20). However, the placement of these fossils remained contentious, leaving it  
269 possible that both sub-orders derived from an earlier, unspecialized assemblage (21).  
270 The discovery of an elongate ovipositor in the stem-orthopteran *Ct. frequens* provides  
271 a definitive demonstration that caeliferans derived from ensiferans. Because  
272 rock-crawlers can also be understood as possessing an elongate ovipositor, which  
273 would render the term ‘Ensifera’ ambiguous, it is proposed to coin a new taxon name,  
274 Neoclavifera, to encompass species bearing an *olis2*, i.e. all extant orthopterans and  
275 their known stem-relatives (Fig. 2G; Supplemental Text section 2.1.1).

276 Another important input on the early evolution of orthopterans regards the  
277 abundance of lobeattids. Indeed, these insects are emerging as the main component of  
278 Pennsylvanian insect faunas. They have been reported in high numbers from all major  
279 Pennsylvanian deposits (1-3; and Supplemental Text section 2.1), such as *Miamia*  
280 *bronsoni* at Mazon Creek (3). At Xiaheyuan, they collectively account for more than  
281 half of all insect occurrences (4). Besides a high abundance, lobeattids and other  
282 stem-orthopterans compose a species-rich group at Xiaheyuan, where they represent  
283 about a third of all insect species currently known to occur at this locality  
284 (Supplemental Text section 3, taxon Archaeorthoptera). Orthoptera, which represent  
285 the bulk of extant polyneopteran insect diversity, therefore must have diversified early  
286 during their evolution.

287

### 288 **Ovipositor shape and use**

289 Extant Orthoptera resort to a wide diversity of substrates where to lay eggs, including  
290 ground, decaying leaves or wood, and stems or leaves of living plants (12, 13, 22, 23).  
291 This operation aims at ensuring a degree of moisture conditions suitable for eggs to  
292 fully develop, and providing protection, for example against predation. Ground is the  
293 preferred substrate of the majority of Orthoptera, including Caelifera (18, 19, 24; and  
294 see above). Within this group, the epiphytic and endophytic habits of several, inner  
295 lineages represent derived conditions (25, 26). This habit translates into finely  
296 serrated ovipositor valves, including *gs9*.

297 As for ‘ensiferan’ Orthoptera, they generally possess a pointed and elongate  
298 ovipositor used to insert eggs in various substrates. In Grylloidea females insert eggs  
299 in the ground using a needle-like ovipositor, or deposit them in subterranean chambers  
300 or burrows adults may inhabit, in which case the ovipositor is usually reduced (13, 27,  
301 28). However, within Grylloidea, three groups, the Trigonidiinae, the Aphonoidinii  
302 and the Oecanthinae, evolved oviposition in plants. In the former, which lay eggs in  
303 soft plant material, *gs9* displays serration in its distal third, along its dorsal edge (29,  
304 30). In contrast, both Aphonoidinii and Oecanthinae lay eggs in more robust plant  
305 material, translating into apices of *gs9* provided with strongly sclerotized sets of teeth

306 and hooks (27). In Oecanthinae, in which oviposition functioning was studied in most  
307 detail, the alternate back and forth movements of gp8 induce apices of gs9 to  
308 alternately approximate and diverge (31), and therefore act as a shoving tool.

309 The Rhaphidophoridae commonly lay eggs into the ground, or, alternatively, into  
310 rotten leaves or wood (32). In the latter case the ovipositor is often curved.  
311 Interestingly, *Ceuthophilus* spp. use the ovipositor tip, somewhat truncated, to rake  
312 ground surface above oviposition holes (33), presumably to hide them.  
313 Anostomatidae lay eggs in the ground or on walls of subterranean chambers (34,  
314 35). These preferences also apply to both Gryllacrididae (36, 37) and Stenopelmatidae  
315 (38; not represented in Figure 2G), in which the ovipositor, if well-developed, is long,  
316 narrow, and rectilinear to curved (39, 40).

317 Although most Tettigoniidae (katydids) lay eggs in the ground, a variety of plant  
318 tissues, including galls, are also targeted by members of this very diverse family (12,  
319 41, 42). As above, shape and serration relate, to a large extent, to the preferred  
320 substrate. A needle-shaped ovipositor generally indicates preference for ground, a  
321 sickle-shaped one for plant tissues. Curved ovipositors indicate preference for  
322 decaying wood, and more strongly falcate ones, which are usually also laterally  
323 flattened (as opposed to sub-cylindrical), preference for either bark crevices or leaf  
324 tissues. Katydid laying eggs in hollow grass stems or leaf sheaths possess straight to  
325 slightly falcate, flattened and unarmed ovipositors. Marked serration on the dorsal  
326 side of the ovipositor indicates preference for plant tissues.

327 Given the relation of ovipositor shape and substrate in recent species, *Ct. frequens*,  
328 with its needle-shaped ovipositor including ventrally oriented teeth, likely oviposited  
329 in the ground (Fig. 4). It is therefore unlikely that Pennsylvanian stem-orthopterans  
330 were responsible for endophytic oviposition traces documented for this epoch (43,  
331 44).

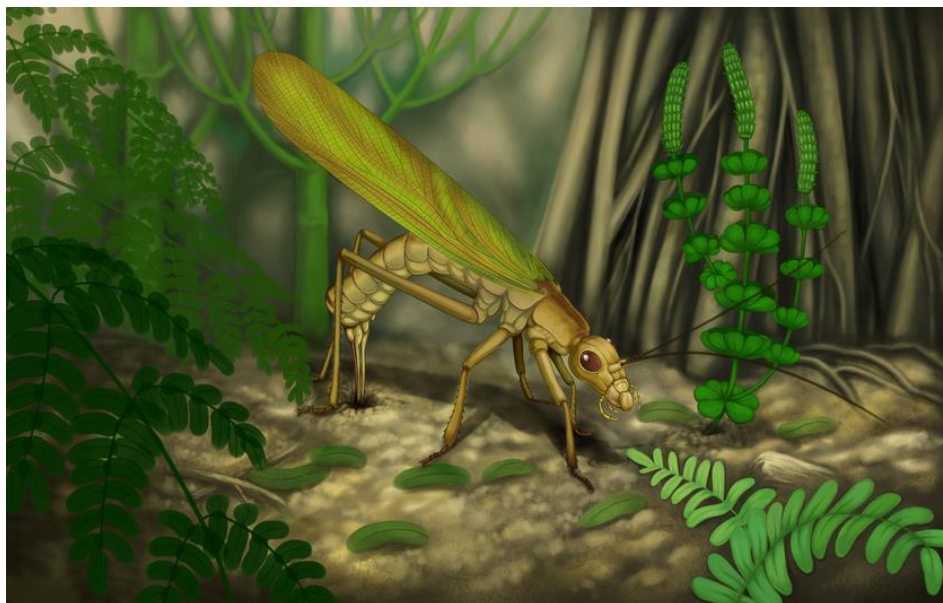

332  
333

Figure 4 Reconstruction of a female of *Ctenoptilus frequens* sp. nov. laying eggs.

### 334 **Dietary preferences**

335 Unlike in an extant tropical forest, a limited proportion of Pennsylvanian plant foliage  
336 experienced external damage, in particular generalized feeding types such as margin  
337 and hole feeding. Although such damages were reported from multiple localities, they  
338 are so rare that their occurrence was considered worth being reported (44-47).  
339 Quantitative data from Pennsylvanian localities indicate that generalized external  
340 damages were indeed rare, and concentrated on pteridosperms ('seed ferns'; 48, 49).  
341 Such damages have been traditionally assigned to Orthoptera and their purported  
342 stem-relatives (9). Indeed, investigation of mouthparts morphology in a subset of  
343 these insects suggested that, at least for the representatives belonging to the  
344 Panorthoptera/Saltatoria (Fig. 2G), these insects were herbivores (50). However, there  
345 is an inconsistency between the paucity of damage on Pennsylvanian plant foliage on  
346 the one hand, and the abundance of lobeattid insects on the other. If these insects were  
347 all external foliage feeders, evidence of such damage would be more prevalent.

348 Given the reconstruction of the mandibular gnathal edge and its position in PC  
349 space in relation to other Orthoptera and Polyneoptera (Fig. 3E; Supplemental Text  
350 section 2.3), *Ct. frequens* was likely an omnivore species - not a solely herbivorous or  
351 carnivorous one. The new species is the second most common insect species at  
352 Xiaheyan, where it occurs in all fossiliferous layers at a rate of ca. 10%. This implies  
353 that a significant portion of Pennsylvanian neopteran insects were opportunistic,  
354 omnivorous species, which reconciles the paucity of foliage damage with the  
355 abundance of stem-Orthoptera.

356

## 357 **MATERIAL AND METHODS**

### 358 **Fossil material**

359 The studied specimens are housed at the Key Laboratory of Insect Evolution and  
360 Environmental Changes, College of Life Sciences, Capital Normal University, Beijing,  
361 China (CNU). All specimens were collected from the locality near Xiaheyan village,  
362 where insect carcasses deposited in an interdeltaic bay (4).

363 The adopted morphological terminology is detailed in *SI Appendix* (section 1.1).  
364 Documentation methodology is detailed in *SI Appendix* (section 1.2.1). General  
365 habitus was investigated based on a selection of 23 specimens (including the holotype;  
366 Supplemental Text section 2.1.2). Ovipositor morphology was investigated based on  
367 four specimens (Supplemental Text section 1.2.2). Head and mouthparts morphology  
368 was investigated based on six specimens (Supplemental Text section 1.2.3).

369

### 370 **Comparative analyses**

371 Fossil ovipositor morphology was compared to original material of extant species and  
372 to literature data (Supplemental Text sections 1.3.1, 2.2). Multiple interpretations of  
373 the fossil ovipositor morphology were considered. Among these, the favoured  
374 interpretation is the only one consistent with observations made on all specimens.

375 The mechanical advantage (MA) of the mandibles, i.e. the inlever to outlever



376 ratio, indicates the effectivity of force transmission from the muscles to the food item  
377 (fig. S1). Apart from force transmission, the MA can also indicate the dietary niche  
378 and feeding habits (51-53). The MA was extracted from 43 recent polyneopteran  
379 species including 31 orthopterans and one composite fossil mandible representation  
380 (CFMR) of the newly described fossil species (Supplemental Text sections 1.3.2, 1.4,  
381 tab. S2). The CFMR was derived from a Procrustes superimposition (R package  
382 “geomorph” v.3.0.5; 54) of four fossil specimens which showed low levels of overall  
383 distortion and a mandible orientation suitable for extraction of individual MAs. For  
384 comparison of species and inference of the dietary niche, a principal component  
385 analysis (PCA) and, due to the detection of significant phylogenetic signal, a  
386 phylogenetic PCA (pPCA; R package “phytools” v.0.6–44; 55), were performed (for  
387 results of the pPCA see *SI Appendix* fig. S9, tab. S3).

388

### 389 SUPPLEMENTAL INFORMATION

390 **Supplemental Information** includes Supplemental Text, ten Figures and three Tables  
391 and can be found at <http://dx.doi.org/xxxx>

392 **Supplemental data** (RTI files) are available for this paper at

393 [https://datadryad.org/stash/share/dmV-cfJHy2D475ILETIdQOzZ6HpxDWlnRk6xsw2](https://datadryad.org/stash/share/dmV-cfJHy2D475ILETIdQOzZ6HpxDWlnRk6xsw2yxXc)  
394 [yxXc](https://datadryad.org/stash/share/dmV-cfJHy2D475ILETIdQOzZ6HpxDWlnRk6xsw2yxXc)

395

### 396 REFERENCES

- 397 1. O. Béthoux, A. Nel, Some Palaeozoic 'Protorthoptera' are 'ancestral' orthopteroids:  
398 major wing braces as clues to a new split among the 'Protorthoptera'. *J. Syst.*  
399 *Paleontol.* **2 / 3**, 285–309 / 223 (corrigendum) (2005).
- 400 2. O. Béthoux, Reassigned and new basal Archaeorthoptera from the Upper  
401 Carboniferous of Mazon Creek (IL, USA). *J. Orthoptera Res.* **14**, 121–126  
402 (2005).
- 403 3. O. Béthoux, Revision and phylogenetic affinities of the lobeatid species *bronsoni*  
404 Dana, 1864 and *silvatica* Laurentiaux & Laurentiaux-Vieira, 1980 (Pennsylvanian;  
405 *Archaeorthoptera*). *Arthropod Syst. Phylogeny* **66**, 145–163 (2008).
- 406 4. S. Trümper, J. W. Schneider, T. Nemyrovskaya, D. Korn, U. G. Linnemann, D. Ren,  
407 O. Béthoux, Age and depositional environment of the Xiaheyan insect fauna,  
408 embedded in marine black shales (Early Pennsylvanian, China). *Palaeogeogr.*  
409 *Palaeoclimatol. Palaeoecol.* **538**, 109444 (2020).
- 410 5. O. Béthoux, Cnemidolestodea (Insecta): an ancient order reinstated. *J. Syst.*  
411 *Paleontol.* **3**, 403–408 (2005).
- 412 6. O. Béthoux, A. Nel, Venation pattern and revision of Orthoptera sensu nov. and  
413 sister groups. Phylogeny of Palaeozoic and Mesozoic Orthoptera sensu nov.  
414 *Zootaxa* **96**, 1–88 (2002).
- 415 7. A. P. Rasnitsyn, On the discussion of the wing venation of (Archae)Orthoptera  
416 (Insecta). *Paleontol. J.* **41**, 341–344 (2007).
- 417 8. D. S. Aristov, Classification of the order Cnemidolestida (Insecta: Perlidea) with

- 418 descriptions of new taxa. *Far East. Entomol.* **277**, 1–46 (2014).
- 419 9. C. C. Labandeira, Early history of Arthropod and vascular plant associations. *Ann.*  
420 *Rev. Earth Planet. Sci.* **26**, 329–377 (1998).
- 421 10. M. Pecharová, D. Ren, J. Prokop, A new palaeodictyopteroid (Megasecoptera:  
422 Brodiopteridae) from the Early Pennsylvanian of northern China reveals unique  
423 morphological traits and intra-specific variability. *Alcheringa* **39**, 236–249  
424 (2015).
- 425 11. K.-D. Klass, The female abdomen of ovipositor-bearing Odonata (Insecta:  
426 Pterygota). *Arthropod Syst. Phylogeny* **66**, 45–142 (2008).
- 427 12. P. Cappe de Baillon, Contribution anatomique et physiologique à l'étude de la  
428 reproduction chez les Locustiens et les Grylloniens. – I. La ponte et l'éclosion  
429 chez les Locustiens. *Cellule* **31**, 1–245 (1920).
- 430 13. P. Cappe de Baillon, Contribution anatomique et physiologique à l'étude de la  
431 reproduction chez les Locustiens et les Grylloniens. II. *Cellule* **32**, 1–193 (1922).
- 432 14. N. G. Kluge, Structure of ovipositors and Cladoendesis of Saltatoria, or  
433 Orchesopia. *Entomol. Rev.* **96**, 1015–1040 (2016).
- 434 15. E. M. Walker, The terminal abdominal structures of orthopteroid insects: a  
435 phylogenetic study. *Ann. Entomol. Soc. Am.* **12**, 267–316 + pls 220–228 (1919).
- 436 16. K. J. Thompson, Oviposition digging in the grasshopper. I. Functional anatomy  
437 and the motor programme. *J. Exp. Biol.* **122**, 387–411 (1986).
- 438 17. S. M. Fedorov, Studies in the copulation and oviposition of *Anacridium*  
439 *aegyptium*, L. (Orthoptera, Acrididae). *Trans. Entomol. Soc. London* **75**, 53–61 +  
440 pls V–VIII (1927).
- 441 18. B. Uvarov, *Grasshoppers and Locusts. A handbook of general Acridology.*  
442 *Volume I. Anatomy, Physiology, Development, Phase polymorphism, Introduction*  
443 *to Taxonomy* (Cambridge University Press, Cambridge, UK, 1966), pp. 481.
- 444 19. T. W. Stauffer, D. W. Whitman, "Grasshopper oviposition" in *The bionomics of*  
445 *grasshoppers, katydids and their kin*, S. K. Gangwere, M. C. Muralirangan, M.  
446 Muralirangan, Eds. (CAB International, Wallingford, UK, 1997), pp. 231–280.
- 447 20. A. G. Sharov, Filogeniya orthopteroidnykh nasekomykh. *Trudy*  
448 *Paleontologicheskovo instituta, Akademiya Nauk SSSR* **118**, 1–216 (1968).
- 449 21. K. Ander, Vergleichend anatomische und phylogenetische Studien über die  
450 Ensifera (Saltatoria). *Opusc. Entomol. Suppl.* **2**, 1–306 (1939).
- 451 22. D. C. F. Rentz, "Orthoptera (Grasshoppers, locusts, katydids, crickets)" in *The*  
452 *Insects of Australia*, I. D. Naumann, P. B. Crane, J. F. Lawrence, E. S. Nielsen, J.  
453 P. Spradbery, R. W. Taylor, M. J. Whitten, M. J. Littlejohn, Eds. (Melbourne  
454 University Press, Melbourne, ed. 2nd, 1991), vol. 1, pp. 369–393.
- 455 23. S. Ingrisch, D. C. F. Rentz, "Orthoptera" in *Encyclopedia of Insects*, V. H. Resh,  
456 R. T. Cardé, Eds. (Academic Press, Cambridge, USA, 2009), pp. 732–743.
- 457 24. S. B. D. Agarwala, A comparative study of the ovipositor in Acrididae – II  
458 (Contd.). *Ind. J. Entomol.* **15**, 53–69 (1952).
- 459 25. W. Ramme, Die Eiablage von *Chrysochraon dispar* Germ. (Orth. Acrid.).

- 460 *Zeitschrift für Morphologie und Ökologie der Tiere* **7**, 127–133 (1926).
- 461 26. H. E. Braker, Evolution and ecology of oviposition on host plants by acridoid  
462 grasshoppers. *Biological Journal of the Linnean Society* **38**, 389–406 (1989).
- 463 27. W. Loher, M. Dambach, "Reproductive behaviour" in *Cricket behavior and*  
464 *neurobiology*, F. Huber, T. E. Moore, W. Loher, Eds. (Cornell University Press,  
465 Ithaca, USA, 1989), pp. 43–82.
- 466 28. D. Otte, R. D. Alexander, The Australian crickets (Orthoptera: Gryllidae). *Monogr.*  
467 *Acad. Nat. Sci. Philadelphia* **22**, 1–477 (1983).
- 468 29. D. Otte, D. Perez-Gelabert, *Caribbean crickets* (The Orthopterists' Society,  
469 Philadelphia, USA, 2009).
- 470 30. T.-W. Kim, A taxonomic review of the sword-tailed cricket subfamily  
471 Trigonidiinae (Orthoptera: Ensifera: Gryllidae) from Korea. *Animal Syst. Evol.*  
472 *Diversity* **29**, 74–83 (2013).
- 473 31. M. Dambach, H. Igelmund, Das Ei-Ablageverhalten von Grillen. *Entomol.*  
474 *General.* **8**, 267–280 (1983).
- 475 32. T. H. Hubbell, A monographic revision of the genus *Ceuthophilus* (Orthoptera,  
476 Gryllacrididae, Rhabdophorinae). *Univ. Florida Pub., Biol. sci. series* **2**, 1–551  
477 + 532 pls (1936).
- 478 33. T. H. Hubbell, C. Norton, The systematics and biology of the cave-crickets of the  
479 North American Tribe Hadenocini (Orthoptera Saltatoria: Ensifera:  
480 Rhabdophoridae: Dolichopodinae). *Misc. Pub., Mus. Zool., Univ. Michigan* **156**,  
481 i–vii + 1–124, 125 pls. (1978).
- 482 34. G. B. Monteith, L. H. Field, "Australian king crickets: distribution, habitats, and  
483 biology (Orthoptera: Anostomatidae)" in *The biology of wetas, king crickets,*  
484 *and their allies*, L. H. Field, Ed. (CABI, Wallingford, 2001), pp. 79–94.
- 485 35. I. A. N. Stringer, "The reproductive biology and the eggs of New Zealand  
486 Anostomatidae" in *The biology of wetas, king crickets, and their allies*, L. H.  
487 Field, Ed. (CABI, Wallingford, 2001), pp. 379–397.
- 488 36. R. J. Hale, D. C. F. Rentz, "The Gryllacrididae: an overview of the world fauna  
489 with emphasis on Australian examples" in *The biology of wetas, king crickets and*  
490 *their allies*, L. H. Field, Ed. (CABI Publishing, Wallingford & New York, 2001),  
491 pp. 95–110.
- 492 37. S. R. Morton, D. C. F. Rentz, Ecology and taxonomy of fossorial, granivorous  
493 gryllacridids (Orthoptera: Gryllacrididae) from arid central Australia. *Austr. J.*  
494 *Zool.* **31**, 557–579 (1983).
- 495 38. A. C. Davis, Studies of the anatomy and histology of *Stenopelmatus fuscus* Hald.  
496 *Univ. California Pub. Entomol.* **4**, 159–208, pls. 151–155 (1927).
- 497 39. O. J. Cadena-Castañeda, A proposal towards classification of the Raspy Crickets  
498 (Orthoptera: Stenopelmatoidea: Gryllacrididae) with zoogeographical comments:  
499 An initial contribution to the higher classification of the Gryllacridines. *Zootaxa*  
500 **4605**, 1–100 (2019).
- 501 40. S. Ingrisch, New taxa and records of Gryllacrididae (Orthoptera,

- 502 Stenopelmatoidea) from South East Asia and New Guinea with a key to the  
503 genera. *Zootaxa* **4510**, 1–278 (2018).
- 504 41. D. C. F. Rentz, *The complete field guide to the katydids of Australia* (CSIRO  
505 Publishing, Collingwood, Australia, 2010), pp. 214.
- 506 42. D. T. Gwynne, *Katydid and bush-crickets: reproductive behavior and evolution*  
507 *of the Tettigoniidae* (Cornell University Press, Ithaca, USA, 2001), pp. i–xii + 317  
508 pp.
- 509 43. O. Béthoux, J. Galtier, A. Nel, Earliest evidence of insect endophytic oviposition.  
510 *Palaios* **19**, 408–413 (2004).
- 511 44. M. Laaß, N. Hauschke, First evidence of borings in calamitean stems and other  
512 plant-arthropod interactions from the late Pennsylvanian of the Saale Basin.  
513 *Hallesch. Jahrb. Geowissensc.* **46**, 29–31 (2019).
- 514 45. A. C. Scott, T. N. Taylor, Plant/animal interactions during the Upper  
515 Carboniferous. *Bot. Rev.* **49**, 259–307 (1983).
- 516 46. R. Iannuzzi, C. C. Labandeira, The oldest record of external foliage feeding and  
517 the expansion of insect folivory in land. *Ann. Entomol. Soc. Am.* **101**, 79–94  
518 (2008).
- 519 47. P. Correia, A. R. Bashforth, Z. Šimůnek, C. J. Cleal, A. A. Sá, C. C. Labandeira,  
520 The history of herbivory on Sphenophytes: a new Calamitalean with an insect  
521 gall from the Upper Pennsylvanian of Portugal and a review of Arthropod  
522 herbivory on an ancient lineage. *International Journal of Plant Sciences* **181**,  
523 387–418 (2020).
- 524 48. Q. Xu, J. Jin, C. C. Labandeira, Williamson Drive: Herbivory from a  
525 north-central Texas flora of latest Pennsylvanian age shows discrete component  
526 community structure, expansion of piercing and sucking, and plant  
527 counterdefenses. *Review of Palaeobotany and Palynology* **251**, 28–72 (2018).
- 528 49. M. P. Donovan, S. G. Lucas, Insect herbivory on the Late Pennsylvanian Kinney  
529 Brick Quarry flora, New Mexico, USA. *New Mexico Museum of Natural History*  
530 *and Science Bulletin* **84**, 193–207 (2021).
- 531 50. C. C. Labandeira, "The fossil record of insect mouthparts: innovation, functional  
532 convergence, and associations with other organisms" in *Insect mouthparts –*  
533 *Form, function, development and performance*, H. W. Krenn, Ed. (Springer  
534 International Publishing, Cham, Switzerland, 2019), pp. 567–671.
- 535 51. A. Blanke, "The early evolution of biting-chewing performance in Hexapoda" in  
536 *Insect mouthparts – Form, function, development and performance*, H. W. Krenn,  
537 Ed. (Springer International Publishing, Cham, Switzerland, 2019), pp. 175–202.
- 538 52. M. Sakamoto, Jaw biomechanics and the evolution of biting performance in  
539 theropod dinosaurs. *Proc. Roy. Soc. B.* **277**, 3327–3333 (2010).
- 540 53. M. W. Westneat, Evolution of levers and linkages in the feeding mechanisms of  
541 fishes. *Integr. Comp. Biol.* **44**, 378–389 (2004).
- 542 54. D. C. Adams, E. Otárola-Castillo, geomorph: an R package for the collection and  
543 analysis of geometric morphometric shape data. *Meth. Evol. Evol.* **4**, 393–399



- 544 (2013).
- 545 55. L. J. Revell, phytools: an R package for phylogenetic comparative biology (and  
546 other things). *Meth. Evol. Evol.* **3**, 217–223 (2012).
- 547 56. E. L. Smith, Evolutionary morphology of external insect genitalia. 1. Origin and  
548 relationships to other appendages. *Ann. Entomol. Soc. Am.* **62**, 1051–1079 (1969).
- 549 57. K. Ander, "Orthoptera saltatoria" in *Taxonomist's glossary of genitalia in insects*,  
550 S. L. Tuxen, Ed. (Enjar Munksgaard, Copenhagen, Denmark, 1956), pp. 53–62.
- 551 58. L. Chen, A. Blanke, J.-J. Gu, Q. Yang, D. Ren, O. Béthoux, Ovipositor and  
552 mouthparts in a fossil insect support a novel ecological role for early orthopterans  
553 in Pennsylvanian forests. *Dryad Digital Repository* (submitted, accessible to  
554 reviewers at  
555 [https://datadryad.org/stash/share/dmV-cfJHy2D475lLETIdQOzZ6HpxDWlnRk6](https://datadryad.org/stash/share/dmV-cfJHy2D475lLETIdQOzZ6HpxDWlnRk6xsw2yxXc)  
556 [xsw2yxXc](https://datadryad.org/stash/share/dmV-cfJHy2D475lLETIdQOzZ6HpxDWlnRk6xsw2yxXc)).
- 557 59. M. W. Westneat, Feeding, function, and phylogeny: analysis of historical  
558 biomechanics in labrid fishes using comparative methods *Syst. Biol.* **44**, 361–383  
559 (1995).
- 560 60. W. J. Cooper, M. W. Westneat, Form and function of damselfish skulls: rapid and  
561 repeated evolution into a limited number of trophic niches. *BMC Evol. Biol.* **9**, 24  
562 (2009).
- 563 61. E. R. Dumont, K. Samadevam, I. Grosse, O. M. Warsi, B. Baird, L. M. Davalos,  
564 Selection for mechanical advantage underlies multiple cranial optima in New  
565 World leaf-nosed bats. *Evolution* **68**, 1436–1449 (2014).
- 566 62. P. A. Yushkevich, J. Piven, H. C. Hazlett, R. G. Smith, S. Ho, J. C. Gee, G. Gerig,  
567 User-guided 3D active contour segmentation of anatomical structures:  
568 significantly improved efficiency and reliability. *Neuroimage* **31**, 1116–1128  
569 (2006).
- 570 63. S. Richter, G. Edgecombe, G. D. F. Wilson, The lacinia mobilis and similar  
571 structures – a valuable character in arthropod phylogenetics? *Zool. Anz.* **241**,  
572 339–361 (2002).
- 573 64. A. H. Staniczek, The mandibule of silverfish (Insecta: Zygentoma) and mayflies  
574 (Ephemeroptera): its morphology and phylogenetic significance. *Zool. Anz.* **239**,  
575 147–178 (2000).
- 576 65. G. Fleck, Phylogenetic affinities of Petaluridae and basal Anisoptera families  
577 (Insecta: Odonata). *Stutt. Beitr. Naturk. A (N.S.)* **4**, 83–104 (2011).
- 578 66. H. Song, O. Béthoux, S. Shin, A. Donath, H. Letsch, S. Liu, D. D. McKenna, G.  
579 Meng, B. Misof, L. Podsiadlowski, X. Zhou, B. Wipfler, S. Simon, Phylogenomic  
580 analysis sheds light on the evolutionary pathways towards acoustic  
581 communication in Orthoptera. *Nature Communications* **11**, 1–16 (2020).
- 582 67. O. Béthoux, Cladotypic taxonomy applied: titanopterans are orthopterans.  
583 *Arthropod Syst. Phylogeny* **65**, 135–156 (2007).
- 584 68. S. Pavoine, C. Ricotta, Testing for phylogenetic signal in biological traits: the  
585 ubiquity of cross-product statistics. *Evolution* **67**, 828–840 (2013).

- 586 69. O. Béthoux, Propositions for a character-state-based biological taxonomy. *Zool.*  
587 *Scr.* **36**, 409–416 (2007).
- 588 70. P. D. Cantino, A. De Queiroz, *International Code of Phylogenetic Nomenclature*  
589 *(PhyloCode)* (CRC Press, Boca Raton, FL, USA, 2020), pp. i–xl + 149 pp.
- 590 71. B. Wipfler, H. Letsch, P. B. Frandsen, P. Kapli, C. Mayer, D. Bartel, T. R.  
591 Buckley, A. Donath, J. S. Edgerly-Rooks, M. Fujita, S. Liu, R. Machida, Y.  
592 Mashimo, B. Misof, O. Niehuis, R. S. Peters, M. Petersen, L. Podsiadlowski, K.  
593 Schütte, S. Shimizu, T. Uchifune, J. Wilbrandt, E. Yan, X. Zhou, S. Simon,  
594 Evolutionary history of Polyneoptera and its implications for our understanding  
595 of early winged insects. *PNAS* **116**, 3024–3029 (2019).
- 596 72. S.-L. Du, O. Béthoux, J.-J. Gu, D. Ren, *Protomiamia yangi* gen. et sp. nov. (Early  
597 Pennsylvanian; Xiaheyan, China), a sexually dimorphic Palaeozoic  
598 stem-Orthoptera. *J. Syst. Paleontol.* **15**, 193–204 (2017).
- 599 73. S. L. Chown, K. J. Gaston, Body size variation in insects: a macroecological  
600 perspective. *Biol. Rev.* **85**, 139–169 (2010).
- 601 74. O. Béthoux, Head and leg morphology of *elongata* Brongniart 1893: 433 (Late  
602 Carboniferous, *Archaeorthoptera*): phylogenetic and palaeoecological  
603 implications. *Ann. Zool.* **59**, 141–147 (2009).
- 604 75. E. M. Walker, On the anatomy of *Grylloblatta campodeiformis* Walker. 4.  
605 Exoskeleton and musculature of the abdomen. *Ann. Entomol. Soc. Am.* **36**, 681–  
606 706 (1943).
- 607 76. A. B. Gurney, The external morphology and phylogenetic position of the  
608 woodland cave cricket (*Ceutophilus brevipes* Scudder; Orthoptera; Tettigoniidae).  
609 *J. New York Entomol. Soc.* **44**, 281–316 (1936).

610  
611

612 **Acknowledgements:** We are grateful to the numerous students who collected fossil  
613 insects at Xiaheyan; to B. Kondratieff, S. Schoville and J. Lapeyrie for providing  
614 material for our comparative analysis of ovipositor morphology, and to V.  
615 Rommevaux for mounting and preparing this material; to S. Storozhenko for  
616 providing documentation; to S. Randolph for photographs of NHM Wien specimens; to  
617 S. Ingrish, C. Hemp and D. Rentz for discussion on ovipositor morphology in relation  
618 to substrate in ‘ensiferans’; to C. Labandeira for discussion on the intensity of folivory  
619 during the Pennsylvanian; and to D. Marjanovic and M. Laurin for discussion on  
620 nomenclatural procedures. **Funding:** This work was supported by the National  
621 Natural Science Foundation of China (Nos.31730087, 32020103006), . This project  
622 has received funding from the European Research Council (ERC) under the European  
623 Union’s Horizon 2020 research and innovation programme (grant agreement No  
624 754290) awarded to AB. **Author contributions:** D.R. and O.B. designed research;  
625 O.B. conducted fossil specimens preparation; L.C., A.B. and OB performed research  
626 and prepared figures; L.C., J.-J.G., Q.Y. and O.B. contributed fossil collects; A.B. and  
627 O.B. documented extant species; L.C., A.B., D.R. and O.B. wrote the paper.

628 **Competing interests:** The authors declare no competing interests. **Data and material**  
629 **availability:** All data needed to evaluate the conclusions in the paper are presented in  
630 the paper and/or the Supplemental Information, including Supplemental Text, ten  
631 figures and three tables (available at <http://dx.doi.org/xxxx>), and Supplemental data  
632 (available at  
633 [https://datadryad.org/stash/share/dmV-cfJHy2D4751LETIdQOzZ6HpxDWlnRk6xsw2](https://datadryad.org/stash/share/dmV-cfJHy2D4751LETIdQOzZ6HpxDWlnRk6xsw2yxXc)  
634 [yxXc](https://datadryad.org/stash/share/dmV-cfJHy2D4751LETIdQOzZ6HpxDWlnRk6xsw2yxXc))  
635  
636

# Ovipositor and mouthparts in a fossil insect support a novel ecological role for early orthopterans in Pennsylvanian forests

## Supplemental Information

## CONTENTS

|                                                            |    |
|------------------------------------------------------------|----|
| Supplemental Text.....                                     | 2  |
| 1 Material and Methods.....                                | 2  |
| 1.1 Morphological terminology and abbreviations.....       | 2  |
| 1.2 Documentation of fossil material.....                  | 2  |
| 1.3 Documentation of extant material.....                  | 3  |
| 1.4 Analysis of the mandibular mechanical advantage.....   | 3  |
| 2 Results.....                                             | 5  |
| 2.1 Systematic Palaeontology.....                          | 5  |
| 2.2 Ovipositor comparative analysis.....                   | 15 |
| 2.3 Analysis of the mandibular mechanical advantage.....   | 16 |
| 3 Insect species currently known to occur at Xiaheyan..... | 16 |
| Supplemental Figures.....                                  | 18 |
| Supplemental Tables.....                                   | 27 |



## SUPPLEMENTAL TEXT

### 1 Material and Methods

#### 1.1 Morphological terminology and abbreviations

##### 1.1.1 Head

**Ant**, antenna; **ata**, anterior tentorial arm; **ca**, cardinal sclerite; **ce**, compound eyes; **co**, coronal cleavage line; **ct**, corpotentorium; **f**, frons; **fc**, frontal cleavage line; **ga**, galea; **la**, lacinia; **il**, incisor lobe; **mo**, molar lobe; **md**, mandible; **mp**, maxillary palpus; **pha**, pharynx; **pta**, posterior tentorial arm; **st**, stipital sclerite.

##### 1.1.2 Wings

We use wing venation homologies proposed by Béthoux & Nel (6) for Archaeorthoptera. Corresponding abbreviations are: ScP, posterior Subcosta; R, Radius; RA, anterior Radius; RP, posterior Radius; M, Media; CuA, anterior Cubitus; CuP, posterior Cubitus; CuPa, anterior branch of CuP; CuPb, posterior branch of CuP; AA, anterior Analis; AA1, first anterior Analis; AA2, second anterior Analis. On figures, RFW, LFW, RHW and LHW refer to the left forewing, right forewing, right hind wing and left hind wing, respectively. A ‘furrow’ is a line along which veins and wing membrane are desclerotized. Median and cubital furrows commonly occur in insects.

##### 1.1.3 Ovipositor

Several terminologies have been used to refer to the elongate and sclerotized elements (herein collectively referred to as ‘valves’) composing the ovipositor in insects in general (tab. S1). We favoured Smith’s (56) terminology because it applies widely and is consensually admitted regarding homology hypotheses. In order to ease comparison we resorted to color-coding for selected structures, as follows: light blue, gonostylus (**gs9**); light green, gonapophysis IX (**gp9**); red, gonapophysis VIII (**gp8**); royal blue, olistheter 2 (**olis2**); light orange, olistheter 3 (**olis3**); purple, Ander’s (57) ‘lateral basivalvular sclerite’ (specific to Caelifera). Additional abbreviations applying to olistheter elements are as follows: olistheter 1 (**olis1**); **al**, aulax (i.e. groove, socket in ‘ball-and-socket’); **rh**, rhachis (i.e. ridge, ball in ‘ball-and-socket’).

#### 1.2 Documentation of fossil material

##### 1.2.1 General aspects

Handmade draft drawings were produced using a LEICA MZ12.5 dissecting microscope and illustrated with the aid of a drawing tube (Leica, Wetzlar, Germany). Photographs were taken using Canon EOS 550D or 5D Mark III digital cameras (Canon, Tokyo, Japan), coupled to a Canon 50 mm macro lens, a 100 mm macro lens, or a Canon MP-E 65 mm macro lens, all equipped with polarizing filters. Each specimen was photographed under dry condition and covered with a thin film of ethanol. When available, both imprints were photographed. These photographs were optimized using Adobe Photoshop CC 2015.5 (Adobe Systems, San Jose, CA, USA) and assembled, together with handmade drawings, into a single, multi-layered document. Reproduced photographs referred to as ‘composites’ are a combination of photographs of a dry specimen and the same under ethanol. In addition to traditional photographs, we computed Reflectance Transforming Imaging (RTI) files for details of several specimens. This corpus of data was used to produce illustrations using Adobe

Illustrator CS6 (Adobe Systems, San Jose, CA, USA). Multi-layered documents (photographs only) and RTI files are provided in the associated Dryad dataset (58). Investigated specimens are listed in the section 2.1.2.

Measurements were based on complete specimens illustrated herein and are provided in the following format: minimum/average/maximum.

### **1.2.2 Ovipositor morphology**

The ovipositor morphology was investigated based on specimens CNU-NX1-326 [Fig. 1E and F; and see related files in Dryad repository (58)], -749 [Fig. 2A and B, and fig. S7B and C; and see related files in Dryad repository (58)], -742 [Fig. 2C and D, and fig. S8B and C; and see related files in Dryad repository (58)] and -743 [fig. S5O–Q; and see related files in Dryad repository (58)].

### **1.2.3 Head and mouthparts morphology**

The head and mouthpart morphology was investigated based on six specimens. Four of them (viz. CNU-NX1-326, -747, -754, -764) were investigated for the mechanical advantage (MA; see section 1.4) of their mandibles. The specimens CNU-NX1-749, and -756 were excluded from the analysis because their mandibles were preserved with a slight rotation in the frontal plane, this impeding an accurate measurement of the MA (see below).

## **1.3 Documentation of extant material**

### **1.3.1 Ovipositor morphology**

We complemented the available literature on the morphology of female terminalia which form the ovipositor in polyneopteran lineages and in Orthoptera in particular [12-14, 57; and see Klass (11) and references therein] by preparation of material belonging to various extant species (see section 2.2). External habitus was photographed under various angles. Terminalia, together with the ultimate abdominal segments, were then cut off and mounted in a polyester resin. Three to four sections were made at various levels and hand-polished. Direct observation and photographs (same equipment as above) were used to document them.

### **1.3.2 Mandible morphology**

To allow for inferences about the potential feeding ecology of the fossils, the MA was studied on a phylogenetically diverse sample of extant species including several orders of polyneopteran insects. Twenty-nine recent taxa of Polyneoptera (tab. S2) were investigated using micro-computed tomography ( $\mu$ CT) carried out at several synchrotron facilities: Beamline BW2 and IBL P05 of the outstation of the Helmholtz Zentrum Geesthacht at the Deutsches Elektronen Synchrotron (DESY), the beamline TOMCAT at the Paul Scherrer institute (PSI), the TOPO-TOMO beamline of the Karlsruhe Institute of Technology (KIT), and beamline BL47XU of the Super Photon Ring 8GeV (SPring-8).

## **1.4 Analysis of the mandibular mechanical advantage**

### **1.4.1 Introduction**

The mechanical advantage (MA) is a straightforward biomechanical metric which was first introduced for vertebrates (59) and was used since in studies on vertebrate and arthropod jaw mechanics (52, 60, 61). The MA is defined as the inlever to outlever ratio. For dicondylid

insect mandibles the inlever is the distance between the application of the input force and the joint axis, while the outlever arm is the distance from the biting point to the joint axis (fig. S1).

The MA thus indicates the percentage of force transmitted to the food item (i.e. the effectivity of the lever system). Although more detailed investigations concerning muscular insertion angles, muscle volumes, spatial arrangements and muscle characteristics would be needed to quantify the absolute forces applied to a given food item, the MA is a useful mechanical performance index: It allows a size independent comparison of the relative efficiencies within the mandibular lever system and it can be readily measured in a wide array of dried museum specimens as well as freshly collected ones. Here, we used it to assess the efficiency of the mandibular lever system of insect fossils for the first time.

Automatic segmentations of the mandibles were performed using the software ITK-snap (62) after which STL files were imported into the software Blender ([www.blender.org](http://www.blender.org)) for further processing (fig. S1). The gnathal edge was defined sensu Richter et al. (63) as the area from the pars molaris (proximal to the mouth opening) to the pars incisivus (distalmost tooth). Since the homology of subparts of the gnathal area is debated (63-65), the gnathal outline, as seen when orienting the mandible in line with the rotation axis (fig. S1), was scaled as a percentage of tooth row length. For this, ~800 points for each specimen were wrapped against the gnathal outline in Blender and the distance between each point orthogonal to the mandibular rotation axis (= outlever) was measured. Similarly, one point was placed at the insertion point of *M. craniomandibularis internus* on the mandible and the distance between this point orthogonal to the rotation axis was measured (i.e. inlever). MA measurements were carried out on the segmentations of the left mandible for each specimen. All measurements and calculations were carried out in the R software environment (v. 1.1.383) using custom scripting. Separate MAs for each studied fossil were computed and combined to a composite fossil mandible representation (CFMR) using a Procrustes superimposition as implemented in geomorph v.3.0.5. in order to account for uncertainties in MA extraction due to potential distortion artefacts. From this superimposition the mean MA shape was extracted and used together with the MAs of recent species for the further analysis steps. Polynomial functions of the 1<sup>st</sup> – 20<sup>th</sup> order were fitted against all MA profiles. The Akaike information criterion (AIC) was used to determine the polynomial function with the best relative fit whose coefficients were then used for further analysis.

#### 1.4.2 Phylogenetic signal

Phylogenetic signal was assessed using the most recent phylogenetic estimate of the 1kite consortium ([www.1kite.org](http://www.1kite.org)) as a basis (66). The phylogeny was pruned in order to contain only the taxa analysed here. The fossils were fitted into the phylogenetic estimate based on inference derived from wing venation and leg and ovipositor morphology (Fig. 2). Specifically, *Ct. frequens* possesses a fusion of CuA (emerging from M+CuA) with CuPa, which is the defining character state of the taxon Archaeorthoptera (67), and **olis2**, the defining character state of the taxon Neoclavifera tax. n. (see below). Both taxa include crown-Orthoptera and some stem-relatives. The lack of a branching of CuPa (which would indicate a panorthopteran), and of jumping hind-legs (which would indicate a saltatorian) both indicate that *Ct. frequens* is not a crown-orthopteran.

Phylogenetic signal was assessed using the K statistic as implemented in geomorph

v.3.0.5 (54) with 10,000 random permutations. This test statistic was found to be the most efficient approach to test for phylogenetic signal (68). Since significant phylogenetic signal was detected, a principal component analysis (PCA) as well as phylogenetic PCA as implemented in the phytools package v.0.6-44 (55) were carried out in order to compare the analysed specimens in MA shape space.

## 2 Results

### 2.1 Systematic Palaeontology

In this section the systematics at the family-group level and below conforms to the ICZN to ensure that the new species name is valid under this Code, while that above the family-group, left ungoverned by the corresponding code, conforms to the principles of cladotypic nomenclature (69; and subsequent accounts), itself compliant with the PhyloCode (70). Specifically, a cladotypic definition corresponds to an apomorphy-based definition using two species as internal specifiers (each being anchored to a specimen designated as type). There are minor discrepancies between cladotypic nomenclature practice on the one hand and recommendations of the PhyloCode on the other. Notably, the first author to have associated the selected defining character state and a taxon is to be acknowledged under the former procedure.

#### 2.1.1 Nomenclature above family-group level

Taxon *Neoclavifera* Béthoux, new clade name (*nom. Béthoux n., dis. Kluge, 2016 (14), typ. Béthoux n.*)

**Registration number.** **Xxxx.**

**Definition.** Species that evolved from the hypothetical ancestral species in which the character state ‘in female ovipositor, occurrence of a locking mechanism composed of a rhachis on gonostylus IX and of an aulax on gonapophysis IX’ (also called ‘secondary olistheter’; as opposed to ‘in female ovipositor, absence of a locking mechanism composed of a rhachis on gonostylus IX and of an aulax on gonapophysis IX’), as exhibited by *linderi* Dufour, 1861 (currently assigned to the genus *Dolichopoda* Bolívar, 1880) and *artinii* Griffini, 1913 (currently assigned to the genus *Homogryllacris* Liu, 2007), was acquired.

**Abbreviated definition.**  $\nabla$  apo secondary olistheter [*Dolichopoda linderi* (Dufour, 1861) & *Homogryllacris artinii* (Griffini, 1911)].

**Etymology.** From ‘neo-’, Ancient Greek prefix for ‘new’; ‘clavis’, Latin for ‘key’; and ‘-fera’, Latin suffix for ‘bearing’ (feminine). This is a direct reference to **olis2**, which **rh** resembles a key in cross-section.

**Reference phylogeny.** The monophyly of Orthoptera, which includes all extant species sharing the defining character state of *Neoclavifera*, is beyond doubt. Wipfler *et al.* (71) and Song *et al.* (66) compose two recent accounts on the topic. It follows that the acquisition of the defining character state in the cladotypic species / specifiers, attested by Cappe de Baillon (12), very probably occurred once (14). It is considered lost in Caelifera.

**Qualifying clauses.** Several qualifying clauses are explicit when using a cladotypic definition, but they need to be specified for a PhyloCode usage. The name *Neoclavifera* shall be



considered as invalid as that of a taxon if it occurs that (i) the defining character state was acquired by the cladotypes / specifiers convergently, (ii) the defining character state is a plesiomorphy, (iii) the cladotypes / specifiers belong to a single species and/or (iv) the defining character state does not occur in the specifiers (unless it is secondarily lost). There is no known evidence that one of these clauses might be challenged in our case.

**Composition.** All Saltatoria (including all extant Orthoptera) and ‘lobeattid insects’ (understood as including cnemidolestodeans) (and see section 2.1.2, taxonomic discussion).

**Discussion.** At the first glance, the name *Ensifera* Chopard, 1920, appears as a suitable name to convert. However, it is an explicit reference to the sword-like shape of the ovipositor valves in the corresponding insects, which composes a pre-occupation under cladotypic nomenclature (conversely, the taxon name *Caelifera* Ander, 1936, is an explicit reference to chisel-like shape of the valves). In other words, the name etymologically refers to a character state different from that used to define the new taxon, which makes it unavailable for the aimed purpose. The same applies to the taxon name *Dolichocera* Bei-Bienko, 1964 (‘long horned’; and, conversely, ‘*Brachycera* Bei-Bienko, 1964’ for ‘short horned’), favoured by Kluge (14). Moreover, current classificatory schemes customarily regard *Ensifera* and *Caelifera* as sister-groups, while our results predict that *Caelifera* is to be nested within *Ensifera*. Prolonged ambiguity on the conversion of ‘*Ensifera*’ as a defined taxon is then to be expected, not mentioning the fact that *Ensifera* Lesson, 1843 is a genus name for sword-billed hummingbirds, and *Ensifera ensifera* (Boissonneau, 1839) its type species.

Given this situation, and the absence of a name composing a direct reference to the occurrence of **olis2**, we propose to coin a new one accordingly. Based on our literature survey, Kluge (14) is the first author to have discriminated a taxon on the basis of the defining character state only. This author stated that an **olis2** is the autapomorphy of ‘*Dolichocera*’, but the name being a direct reference to another character state (see above), it follows that a new one is needed, hence *Neoclavifera*.

The meaning of the terms ‘rhachis’ and ‘aulax’ is critical to the proposed definition. Modest elevation and groove likely made the transition from adjoined smooth surfaces to ones bearing a proper rhachis and aulax. It is therefore necessary to define rhachis and aulax, as follows: a rhachis is a projection whose base is narrower than its projected part at its widest (best assessed in cross-section), and an aulax is its counterpart.

As defined, and based on species currently known, the composition of the taxa *Archaeorthoptera* and *Neoclavifera* overlap. We hypothesize that the defining character state of *Archaeorthoptera* was acquired in a hypothetical ancestral species distinct from the one of *Neoclavifera*, but the order of acquisition of their respective defining character states remains unknown.

### 2.1.2 Nomenclature at the family-group level and below

Family Ctenoptilidae Aristov, 2014

Genus *Ctenoptilus* Lameere, 1917

*Ctenoptilus frequens* Chen, Gu & Béthoux, sp. nov.

**Etymology.** Based on ‘*frequens*’ (‘frequent’ in Latin), referring to the abundance of the species at Xiaheyan.

**Holotype.** Holotype: CNU-NX1-326 (female individual; Fig. 1).

**Referred material.** CNU-NX1-198, -199, -731 to -759, -764 (specimens herein figured: CNU-NX1-198, -199, -731, -732, -738, -740–744, -747–754, 756–759).

**Locality and horizon.** Xiaheyan Village, Zhongwei City, Yanghugou Formation (Ningxia Hui Autonomous Region, China); latest Bashkirian (latest Duckmantian) to middle Moscovian (Bolsovian), early Pennsylvanian (4).

**Differential diagnosis.** Compared with *Ctenoptilus elongatus* (Brongniart, 1893), its most closely related species (*SI Appendix*, section 2.1), smaller size (deduced from forewing length) and prothorax longer than wide (as opposed to quadrangular).

**General description.** Body length (excluding antennae, including ovipositor) about 42–52 mm (based on female individuals only). **Head:** prognathous, head capsule heart-shaped in dorsal view; **md** with strongly sclerotized and prominent incisivi and a well-sclerotized molar area; **la** with a strong apical tooth and a smaller sub-apical one; **mp** well-developed, with 5 observed segments; tentorium composed of well-developed **ata**, **ct** and **pta**, dorsal arms not visible; **co** located in the midline along the dorsal side of the head capsule, then branching into two diverging **fc**; **ant** long, filiform. **Thorax:** prothorax longer than wide, longer than head; boundary between mesothorax and metathorax not visible. **Wings:** ScP reaching RA distal to the two thirds of wing length; RA with few or no anterior veinlets; RA and RP strong, parallel for a long distance; RA-RP area narrow in its basal half; at the wing base, R and M+CuA distinct; MA and MP simple for a long distance, with similar numbers of terminal branches, usually 1–3, rarely more than 4; CuA diverging from M+CuA and fusing with CuPa; CuA+CuPa posteriorly pectinate. **Forewing:** length 31.5/36.1/41.2 mm, largest width 6.9/8.3/10.7 mm, membranous; ScP with anterior veinlets; RA-RP fork slightly distal to the point of divergence of M and CuA (from M+CuA); RP branched distally, near the second third of wing length, usually with 11–17 branches reaching apex, and occasionally 1–2 veinlets reaching RA; first split of M+CuA (into M and CuA) near the first fourth of wing length; between the origin of CuA (from M+CuA) and the first fork of RP, M very weak; first fork of M near wing mid-length; MA distinct from RP, connected to it by a short cross-vein, or occasionally fused with it for a short distance; median furrow located along M and then MP; CuA+CuPa with most of its main branches further branched, with a total of 16–26 terminal branches; in basal part, CuA+CuPa emitting strong posterior veinlets, vanishing before they reach the claval furrow; CuPb concave, weak and simple; AA1 with 3–4 branches; AA2 with about 10 branches; cross-veins mostly not reticulated, except along the apical and postero-apical section of the wing margin, and in the ScP/ScP+RA-RP area (where they are particularly strong); longitudinal pigmented areas located (i) along R, (ii) along CuA, and then the main stem of CuA+CuPa and (iii) along the posterior wing margin, distal to the endings of the first branches of CuA+CuPa; these three areas merge distally; additional pigmented area along AA1. **Hind wing:** as in forewing, except for the following: slightly shorter than forewing; RA-RP fork opposite the point of divergence of M and CuA (from M+CuA); RP usually with 11–16 branches reaching apex; M forked at the first quarter of the wing; M with 5–8 branches reaching posterior wing margin; CuA+CuPa with 5–8 branches; pigmented area forming an arc covering the apex, beginning along RA and ending close to the end of CuPb; plicatum well developed, with plica prima anterior reaching the posterior wing

margin opposite the end of ScP (on RA). *Legs*: Fore-leg femur 4.9–6.3 mm long, 1.0–1.3 mm wide, tibia 5.2–6.3 mm long; mid-leg femur 5.2–6.4 mm long, tibiae 5.9–7.3 mm long; hind-leg femur 7.5–11.5 mm long, tibia 9.8–12.0 mm long; spines, probably in two rows, present along the ventral side of tibia of all legs, concentrated near the apex (fore-leg, at least 12 spines; mid-leg, at least 8 spines; hind-leg, at least 15 spines); tarsus 5-segmented, 2<sup>nd</sup>, 3<sup>rd</sup> and 4<sup>th</sup> segments shorter, terminal tarsal segment with paired claws and arolium (deduced from well-preserved fore-legs). **Abdomen**: abdomen about 17–23 mm long (based on female individuals only); female with a prominent sword-like ovipositor (see more detailed interpretation below and specimens description).

**Specimens description. Holotype, CNU-NX1-326 (Fig. 1)**: Positive and negative imprints of an almost complete female individual, viewed dorsally, very well preserved, with head, thorax, leg remains (including well exposed fore-legs) and complete right forewing; right hind apex missing, left wings incomplete, left hind wing very incomplete, ovipositor apex concealed under right forewing. **Head**: about 6.6 mm long, 4.3 mm wide, prognathous; mandibles about 2.0 mm long, with prominent teeth at their apex; gnathal edge of right **md** clearly visible, heavily sclerotized, with the distal incisus shorter than the subdistal ones; **mp** strong, but segments not visible; **f** large and separated to the vertex by a U-shaped line, laterally delimited to the well-developed genal area by a line; frontal and coronal sutures well-developed, located at the closest distance of the eyes to each other; Eyes large, laterally protruding from the head capsule covering about half of the lateral head profile; **ant** incomplete, 6.3 mm long as preserved. **Thorax**: prothorax about 5.5 mm long, 3.7 mm wide. *Left forewing*: preserved length 22.2 mm, best width 8.1 mm; M with its 2 main branches preserved, CuA+CuPa with 22 terminal branches preserved. *Right forewing*: length 32.6 mm, width 9.6 mm; RP simple for 14.3 mm, with 16 branches reaching wing apex and 1 reaching ScP+RA; MA connected to RP by a short cross-vein, with 3 branches, MP with 4 branches; CuA+CuPa with 26 terminal branches preserved; CuPa partly preserved. *Right hind wing*: preserved length: 30.4 mm, best width 8.6 mm; plicatum creased. *Legs*: fore-leg femur about 4.9 mm long and 1.2 mm wide, tibia 6.3 mm long and 0.7 mm wide, tarsus about 5.0 mm long, tarsal segments (5), paired claws and arolium visible; mid- and hind-legs incomplete and/or not well exposed. *Legs*: spines well exposed on foreleg tibiae and distal part of a mid-leg tibia. **Abdomen**: bent (probably a consequence of decay), about 17 mm long, ovipositor viewed laterally, possibly slightly obliquely; bases of **gp8** strongly sclerotized, well visible.

**CNU-NX1-749 (Fig. 2A and B, and fig. S7A–E)**: Positive and negative imprints of an almost complete female individual, wings incomplete and overlapping, body about 45 mm long. **Head**: about 6.4 mm long, 3.5 mm wide. **Thorax**: prothorax about 5.6 mm long, 3.7 mm wide. *Legs*: fore-leg femur 4.9 mm long, 1.2 mm broad, tibia 5.8 mm long, 0.8 mm broad, tarsus about 3.8 mm long; mid-leg femur 5.9 mm long, 1.0 mm broad, tibiae 7.3 mm long, 0.8 mm broad, tarsus about 4.9 mm long; hind-leg femur 6.1 mm long, 1.1 mm broad, tibia 10.1 mm long, 0.7 mm broad; spines visible, or even well-exposed, on each exposed tibiae. **Abdomen**: about 17 mm long (excluding ovipositor); sword-like ovipositor viewed laterally, about 8.4 mm long; antero-basal apophyses of **gs9**, **gp9** and **gp8** distinct, well delineated; near the ovipositor base, dorsal and ventral edges of **gs9** and **gp8**, and ventral edge of **gp9** well delineated; dorsal edge of **gp9** visible in the distal half of the ovipositor; **olis1** and **olis2** visible near the ovipositor base, strongly sclerotized; **olis1** located along the ventral edge of

**gp9** and dorsal edge of **gp8**; **olis2** located close to (or along) the ventral edge of **gs9**, and laterally on **gp9**; **olis1** and **olis2** converging; ventral edge of **gp8** with teeth more prominent and densely distributed near the apex.

**CNU-NX1-742 (Fig. 2C and D, and fig. S8A–C):** Positive and negative imprints of an almost complete female individual, partly disarticulated, left forewing missing; body about 52 mm long. **Head:** detached from the rest of the body, mouthparts not discernible. **Thorax:** prothorax about 7.0 mm long, 3.6 mm width. **Wings:** a forewing and two hind wings visible, poorly preserved. **Legs:** fore-leg femur 5.7 mm long, 1.1 mm broad, tibia 6.2 mm long, 0.9 mm broad; spines well exposed on one hind-leg tibia, some visible on one fore-leg tibia. **Abdomen:** strongly bent, segments not discernible; ovipositor very well preserved, detached from the rest of the abdomen, about 9.5 mm long; antero-basal apophyses of **gs9**, **gp9** and **gp8** distinct, well delineated; near the ovipositor base, dorsal and ventral edges of **gs9** and **gp8**, and ventral edge of **gp9** well delineated; dorsal edge of **gp9** visible at the extreme base and in the distal half of the ovipositor; **olis1** and **olis2** visible near the ovipositor base, strongly sclerotized; **olis1** located along the ventral edge of **gp9** and dorsal edge of **gp8**; **olis2** located close to (or along) the ventral edge of **gs9**, and laterally on **gp9**; **olis1** and **olis2** converging; ventral edge of **gp8** with teeth more prominent and densely distributed near the apex.

**CNU-NX1-754 (Fig. 3A and B, and fig. S7I–K):** Positive and negative imprints of an almost complete individual, well-preserved, wings overlapping, incomplete and partly creased, end of abdomen missing. **Head:** about 6.8 mm long 4.5 mm wide; **md** with strongly sclerotized and prominent incisivi and a well-sclerotized molar area; terminal teeth of **la** visible; **ca** distinguishable; **co** located in the midline along the dorsal side of the head capsule, then branching into two diverging **fc**. **Thorax:** prothorax about 5.9 mm long, 4.4 mm wide. **Legs:** fore-leg femora 5.3 mm long and 1.1 mm broad, tibiae 5.2 mm long and 0.7 mm broad, tarsus about 4.0 mm long; mid-leg femur 5.4 mm long and 1.1 mm broad, tibia 5.9 mm long and 0.8 mm broad, tarsus about 4.5 mm long; fore- and mid-leg tarsi well preserved, 5-segmented with paired claws and arolium; 2<sup>nd</sup>, 3<sup>rd</sup> and 4<sup>th</sup> segments shorter, ventral process (projecting forward) of 3<sup>rd</sup> and 4<sup>th</sup> segments visible; hind-leg femora 7.5 mm long; end of hind-leg tibiae missing, 7.1/5.9 mm long, 0.7 mm broad; spines well-exposed on one of the forelegs tibiae. **Abdomen:** about 14 mm as preserved, segments not discernible.

**CNU-NX1-764 (Fig. 3C and D):** Positive and negative imprints of an almost complete, isolated head, posterior part possibly overlapping with prothorax; mouthparts well preserved; **md** in occlusion, 2.1 mm long, 1.1 mm wide at their base, provided with strongly sclerotized and prominent incisivi and a well-sclerotized molar area; distal part of **la** visible, provided with a strong apical teeth and a smaller sub-apical one; tentorium composed of well-developed **ata**, **ct** and **pta**, dorsal arms not visible; **ct** 1.2 mm long and 0.3 mm wide.

**CNU-NX1-752 (fig. S2A and B):** Positive and negative imprints of a partly incomplete individual, head and prothorax well exposed, a single fore-leg preserved, wings partly spread, right hind wing creased, most of abdomen missing. **Thorax:** prothorax about 7.0 mm long, 4.0 mm wide; *Right forewing:* preserved length 35.1 mm, width 8.8 mm. RP simple for 14.9 mm, with 12 branches preserved; M poorly preserved, MA simple, MP with 3 branches reaching the posterior wing margin; CuA+CuPa incomplete, with 15 visible branches. *Left forewing:* apex missing, preserved length 32.3 mm, width 8.7 mm; M not visible in its median portion; a portion of CuPa basal to its fusion with CuA visible. *Left hind wing:* length 29.5



mm, width 10.0 mm; plicatum in resting position and creased; RP with 11 branches reaching apex; M with 8 terminal branches.

**CNU-NX1-738 (fig. S2C and D):** Imprint of an individual with parts of prothorax and thorax preserved, a left forewing (as negative imprint) and a right hind wing (as positive imprint). *Left forewing*: length 31.3 mm, width 10.3 mm; RP simple for 15.2 mm, with 13 branches reaching wing apex; MA connected to RP by a very short cross-vein; M with a total 5 distal branches (MP simple); CuA+CuPa with 15 preserved terminal branches. *Right hind wing*: partly creased, plicatum not discernible/preserved, wing base not discernible; length 29.6 mm, width 7.2 mm; RP with 13 branches reaching wing apex.

**CNU-NX1-759 (fig. S3A and B):** Imprint of a nearly complete individual, most of head missing, left forewing twisted, right hind wing concealed under right forewing, a mass of circular cavities probably indicates the location of abdominal remains. **Thorax**: prothorax about 6.4 mm long, 3.1 mm wide; *Right forewing*: apex missing, anal area not discernible; length 34.1 mm, best width 8.0 mm; RP simple for 13.7 mm, with 11 branches preserved; one reaching ScP+RA; MA fused with RP for 0.6 mm, with 2 terminal branches, MP with 2 branches; CuA+CuPa not fully discernible, with 16 terminal branches preserved. *Right hind wing*: anterior wing margin and plicatum not discernible; RP with 7 branches preserved; M with 5 branches (2,3), CuA+CuPa incomplete, with 4 branches. *Legs*: left legs almost missing, right fore- and mid-leg with femur and tibia preserved; right fore-leg, femur 5.7 mm long, tibia 5.3 mm long; right mid-leg, femur 6.4 mm long, tibia 8.4 mm long; right hind leg, femur 8.3 mm long, tibia 11.1 mm long, tarsus about 6.6 mm long, with 5 tarsal segments, claws and arolium visible; spines visible on one of the hind-leg tibiae.

**CNU-NX1-750 (fig. S3C and D):** Positive and negative imprints of an almost complete individual, forewings overlapping hind wings, complete set of legs, abdomen poorly preserved and incomplete. **Thorax**: prothorax about 5.9 mm long, 4.2 mm wide. *Right forewing*: preserved length 32.2 mm, best width 8.6 mm; RP simple for 14.2 mm, with 11 branches preserved; MA with 2 branches, MP with 3 branches; CuA+CuPa with 23 terminal branches, CuPb partly visible. *Left forewing*: apex missing, posterior wing margin not discernible; RP simple for 13.49 mm, CuA+CuPa with 18 branches preserved. *Hind wings*: apices and most of margins missing/not discernible, plicata partly unfolded, creased. *Right hind wing*: preserved length 28.3 mm; M with 10 branches reaching apex, CuA+CuPa with 6 branches preserved. *Left hind wing*: basal part not discernible; preserved length 22.7 mm, width 8.7 mm; RP with 4 branches preserved, CuA+CuPa with 5 branches preserved. *Legs*: fore-leg poorly preserved; mid-leg femur 5.4 mm long, 1.1 mm broad, tibia 6.7 mm long, 0.8 mm broad; hind-leg femur 7.9 mm long, 1.3 mm broad, tibia 12.3 mm long, 0.8 mm broad.

**CNU-NX1-731 (fig. S3E and F):** Positive and negative imprints of an almost complete individual, very well-preserved, legs and left hind wing missing; abdomen broken. **Head**: preserved length 6.7 mm. **Thorax**: prothorax about 4.7 mm long, 3.5 mm wide. *Left forewing*: length 39.6 mm, best width 9.1 mm; RP simple for 13.4 mm, with 10 branches reaching apex and one branch reaching with ScP+RA; M well preserved, connect with RP by a long, oblique cross-vein; MA with 3 branches, MP with 1 branch; CuA+CuPa with 17 branches reaching the posterior wing margin, CuPb poorly preserved. *Right forewing*: preserved length 35.9 mm, best width 9.2 mm; a vein interpretable as ScA partly preserved; RP simple for 13.1 mm, with 10 branches reaching apex and one veinlet reaching with ScP+RA; M well preserved, connected with RP by a long, oblique cross-vein; MA with 2 branches, MP with 2 branches;



CuA+CuPa with 19 branches reaching the posterior wing margin; AA area with several branches preserved. *Right hind wing*: apex missing; RP with 10 branches directed towards apex and 2 veinlets reaching with ScP+RA; MA and MP simple for a long distance, with 3 and 2 branches reaching the posterior wing margin, respectively; CuA+CuPa with 6 terminal branches preserved; plicatum folded, creased.

**CNU-NX1-747 (fig. S4A–D)**: Positive and negative imprints of an almost complete individual, left forewing and right hind leg missing. **Head**: about 6.0 mm long, 4.4 mm wide; **md** about 1.7/2.0 mm long, 1.4 mm wide at their base; apical tip of **la** visible, **ct** 0.9 mm long 0.2 mm wide; compound eye oval; circumocular ridge well developed. **Thorax**: prothorax about 5.5 mm long, 3.3 mm wide. *Right forewing*: preserved length about 29 mm, best width 8.2 mm; RP simple for 12.3 mm, with 10 branches, two of them reaching ScP+RA; MA and MP with two branches each; CuA+CuPa with 19 terminal branches visible. *Hind wings*: plicatum folded, with numerous anal veins, not clearly discernible. *Left hind wing*: length 30.1 mm, best width 7.8 mm; RP simple for 9.6 mm, with 11 branches reaching wing apex and a single veinlet reaching ScP+RA; MA and MP simple for a long distance, each with 3 branches; CuA+CuPa posteriorly pectinate, with 6 terminal branches. *Right hind wing*: overlapping with right forewing, only partly discernible; RP simple for 8.3 mm, with 9 branches preserved. *Legs*: right legs poorly preserved and/or incomplete; left fore-leg femur 6.3 mm long and 1.0 mm wide, tibia 5.2 mm long and 0.6 mm wide; mid-leg femur 5.0 mm long and 1.1 mm wide, tibia 6.8 mm long and 0.6 mm wide; hind-leg femur 8.6 mm and 1.0 mm wide, tibia 9.8 mm long and 0.6 mm wide; spines well exposed on both foreleg tibiae, and the preserved mid-leg and hind-leg tibiae.

**CNU-NX1-741 (fig. S4E and F)**: Positive and negative imprints of an incomplete individual, left forewing and thorax preserved, left hind wing and right forewing incomplete. *Left forewing*: apex missing, preserved length 34.8 mm, best width 10.7 mm; RP simple for 15.6 mm, with 7 branches preserved; M poorly preserved, MA and MP with 3 branches each; CuA+CuPa with 23 terminal branches; AA1 with 4 main branches. *Right forewing*: only the basal part preserved, AA1 with 4 branches, AA2 with 6 branches preserved. *Left hind wing*: preserved length 33.1 mm; RP with 6 branches; MA and MP simple in the preserved part.

**CNU-NX1-748 (fig. S5A and B)**: Well preserved isolated right forewing, negative imprint; length 38.4 mm, best width 8.7 mm; RP simple for 14.1 mm, with 12 terminal branches reaching apex; MA with 2 branches, the anterior one connected to RP by a cross-vein; MP with 5 branches; CuA+CuPa with 16 terminal branches reaching the posterior wing margin, and a branch fused with MP; CuPb visible, area between CuPb and AA1 narrow; AA1 with 4 preserved branches.

**CNU-NX1-732 (fig. S5C and D)**: Positive imprint of nearly complete right forewing; preserved length 30.3 mm, best width 6.6 mm; RP simple for 12.8 mm, with 17 branches reaching wing apex and 3 branch reaching ScP+RA; basal portion of M relatively well-preserved, first fork located opposite wing mid-length; MA simple; MP with 3 branches reaching posterior wing margin and a veinlet fusing with MA; CuA+CuPa with 16 branches; AA1 with 3 branches.

**CNU-NX1-757 (fig. S5E and F)**: Negative imprint of a well-preserved, isolated right forewing; length 35.3 mm, best width 8.4 mm; RP simple for 14.4 mm, with 12 branches reaching wing apex and 2 branches reaching ScP+RA; basal portion of M relatively

well-preserved; MA and MP with 4 and 3 branches, respectively; CuA+CuPa with 19 terminal branches reaching posterior wing margin; AA1 with 4 branches; AA2 poorly preserved.

**CNU-NX1-758 (fig. S5G–H):** Negative imprint of a well-preserved, isolated left forewing, slightly creased along the claval furrow; length 36.6 mm, best width 7.2 mm; RP simple for 13.9 mm, with 11 terminal branches reaching apex; MA and MP with 2 and 3 branches, respectively; CuA+CuPa with 16 terminal branches reaching posterior wing margin.

**CNU-NX1-744 (fig. S5I and J):** Negative imprint of a well-preserved, isolated right forewing; length 41.2 mm, best width 8.7 mm; RP simple for 16.0 mm, with 12 terminal branches visible; MA connected to RP by a short cross-vein; MA and MP with 2 terminal branches each; CuA+CuPa with 19 branches reaching posterior wing margin; AA1 with 3 preserved branches.

**CNU-NX1-751 (fig. S5K and L):** Negative imprint of nearly complete forewing pair and apical fragment of a hind wing. *Forewings:* basal half of M and CuPb not visible; MA and MP with 2 branches each. *Left forewing:* preserved length 30.4 mm, best width 6.9 mm; RP simple for 13.7 mm, with 17 branches reaching wing apex; CuA+CuPa with 17 terminal branches, AA1 with 3 branches. *Right forewing:* length 27.1 mm, best width 7.4 mm; RP simple for 13.6 mm, with 14 preserved branches reaching wing apex; CuA+CuPa with 21 terminal branches.

**CNU-NX1-743 (fig. S5M–Q):** Positive imprint of an incomplete right forewing and of an ovipositor. *Right forewing:* basal part missing, preserved length 26.9 mm, best width 7.8 mm; RP with 14 branches reaching wing apex and a veinlet reaching ScP+RA; M and most of MA poorly preserved; MA and MP with 3 branches each; CuA+CuPa incomplete, with 17 branches reaching the posterior wing margin, and 1 veinlet fusing with MP. *Ovipositor:* preserved length 9.2 mm; **olis2** and dorsal margin of **gp8** strongly sclerotized; prominent teeth visible in the distal part of **gp8**.

**CNU-NX1-198 (fig. S6A–B):** Positive and negative imprints of an almost complete individual, head and abdomen missing, wings moderately well preserved, left wings overlapping. **Thorax:** prothorax about 6.6 mm long, 3.9 mm wide. *Right forewing:* length 32.1 mm, best width 8.8 mm; RP simple for 12.1 mm, with 9 branches preserved; M poorly preserved, MA and MP with 3 and 2 branches, respectively; CuA+CuPa incomplete, with 14 branches preserved. *Right hind wing:* length 28.7 mm, best width 14.6 mm; RP simple for 14.6 mm, with 8 branches preserved; MA and MP simple for a long distance, M with 7 branches reaching the posterior wing margin; fusion of CuA (emerging from M+CuA) with CuPa visible; CuA+CuPa with 7 terminal branches; CuPb partly preserved; plicatum almost fully deployed, large, probably with vannal folds; AA with 9 branches preserved.

**CNU-NX1-740 (fig. S6C and D):** Positive and negative imprints of an incomplete individual, with forewings and right hind wing poorly preserved, abdomen not discernible. **Head:** 7.5 mm long, 4.7 mm wide. **Thorax:** prothorax about 5.5 mm long, 4.5 mm wide. *Left hind wing:* apex missing; fusion of CuA (emerging from M+CuA) with CuPa visible; plicatum well deployed, large, with several veins preserved (attributable to AA). *Legs:* fore-leg femur length 5.5 mm long and 1.2 mm wide; mid-leg femur 5.2 mm long and 1.2 mm wide; hind-leg femur 11.5 mm long and 1.2 mm wide, tibiae 12.0 mm long and 0.8 mm wide, tarsus about 6.2 mm long, paired claws and arolium preserved.

**CNU-NX1-199 (fig. S6E and F):** Positive and negative imprints of isolated right hind wing; wing base not discernible, apex missing; preserved length 17.4 mm, best width 10.1 mm; RP simple for 8.9 mm, with 6 branches preserved; M with 5 branches reaching the

posterior wing margin; CuA+CuPa with 8 terminal branches; plicatum well-deployed, with 17 branches preserved (attributable to AA).

**CNU-NX1-753 (fig. S6G and H):** Negative imprint of an isolated left hind wing, plicatum not discernible/preserved; length 34.2 mm, best width 10.1 mm; at the wing base, M+CuA distinct from R; RP simple for 9.5 mm, with 16 branches reaching wing apex; MA and MP simple for a long distance, with 3 and 4 branches, respectively; CuA+CuPa with 5 terminal branches preserved; plicatum with several visible veins (attributable to AA).

**CNU-NX1-756 (fig. S7F–H):** Positive and negative imprints of an almost complete female individual, wings poorly preserved and incomplete, total length (excluding **ant**) about 51 mm. **Head:** 7.1 mm long, 3.6 mm wide; **md** open; left **md** with well-discernible **il** and **mo**; left **la** with a strong apical tooth and a smaller sub-apical one; **co** located in the midline along the dorsal side of the head capsule, then branching into two diverging **fc**; **ant** long, filiform; **ce** 1.4 mm long and 0.8 mm wide. **Thorax:** prothorax about 5.8 mm long, 4.0 mm wide. **Abdomen:** length about 23 mm, segments not discernible; exposed portion of ovipositor about 5.0 mm long.

**Taxonomic discussion.** The new species is closely related to a number of Pennsylvanian insects collectively referred to as ‘lobeattids’ and characterized by (i) a RA/RP fork located basally, (ii) a RA-RP area widening sharply distal to the end of ScP (on RA) and (iii) CuA+CuPa with one main anterior branch posteriorly pectinate and with abundant branches (commonly, ca. 20) reaching the posterior wing margin. This assemblage includes *Eoblatta robusta* (Brongniart, 1893) and *Ctenoptilus elongatus* (Brongniart, 1893), from the Commeny locality (France); *Lobeatta schneideri* Béthoux, 2005, *Anegertus cubitalis* Handlirsch, 1911 and *Nectoptilus mazonus* Béthoux, 2005, from Mazon Creek (USA); *Nosipteron niedermoschelensis* Béthoux & Poschmann, 2009, from Niedermoschel (Germany); *Lomovatka udovichenkovi* Aristov, 2015, from Lomovatka (Ukraine); *Beloatta duquesni* Nel, Garrouste & Roques; and *Sinopteron huangheense* Prokop & Ren, 2007, *Chenxiella liuae* Liu, Ren & Prokop, 2009, *Longzhua loculata* Gu, Béthoux & Ren, 2011 and *Protomiamia yangi* Du, Béthoux, Gu & Ren, 2017 from Xiaheyan (China). The genus *Miamia* Dana, 1864 and the order Cnemidolestodea are derived members of this assemblage.

Compared with known species, the new one is mostly similar to *Ct. elongatus*, *Ne. mazonus* and *Lom. udovichenkovi* owing to the elongate to very elongate shape of the forewing (presumed in the latter). A further similarity of the new species with *Ct. elongatus* and *Lom. udovichenkovi* is the occurrence of numerous posterior basal veinlets of CuA+CuPa vanishing before reaching CuPb. Strikingly, the new species and *Ct. elongatus* share a very particular forewing coloration pattern, with three longitudinally-orientated, pigmented bands. We therefore propose to assign the new species to the genus *Ctenoptilus* Lameere, 1917.

Note that Béthoux & Nel (1) identified, in one specimen of *Ct. elongatus*, a linear structure they interpreted as MP, that would indicate a basal position of the first fork of M. However, based on data on the new species and on the original descriptions of *Ne. mazonus* and *Lom. udovichenkovi*, we assume that the ‘linear structure’ is more likely the median furrow alone. If so, the first fork of M, in *Ct. elongatus*, might well be located closer to the middle of the forewing, as in the new species and in *Ne. mazonus* and *Lom. udovichenkovi*. Note that this fork is located more basally in *Lom. udovichenkovi* than in the new species.

The forewing of the new species is smaller than in *C. elongatus*. Even though

post-depositional deformation is known to have occurred at Xiaheyuan and might have artificially elongated the forewing, the longest forewing of the new species is ca. 40 mm (with an average at ca. 36 mm), while *Ct. elongatus* forewings are 45–50 mm long. Note that female-biased sexual size dimorphism is known in a related species of Pennsylvanian Archaeorthoptera (72). However, if one assumes that all known specimens of *Ct. elongatus* are males, then females of this species would be even longer. If all known specimens of *Ct. elongatus* are females, then they can be compared with the longest representatives of the new species, but the size gap remains then. Finally, it remains possible that the difference in size is due to a latitudinal gradient (with *Ct. elongatus* living in the equatorial area, the new species at higher latitude), but available data on the impact of latitude in extant insects size variation is too contentious to provide matter for a grounded comparison (73). In summary, differences in size were considered sufficient to erect a new species.

Several specimens of the new species display a prothorax longer than wide (figs S1A and B, S2, and S6A,I), while it is more quadrangular in *Ct. elongatus* (74). It should be acknowledged, however, that the proportions of the prothorax in the holotype (Fig. 1) are similar to those of *Ct. elongatus*.

The set of specimens we investigated all share the coloration pattern typical for both *Ct. elongatus* and *Ct. frequens*. However, they display some variation in the forewing venation. The set of specimens on one hand, and, on the other, data on a few related species for which intra-specific variability was documented, demonstrate that this variability falls within the range of intra-specific variation. Lobeatid species relevant for comparison are *Lon. loculata*, *Miamia bronsoni* Dana, 1864 and *Miamia maimai* Béthoux, Gu, Yue & Ren, 2012.

Several specimens preserving a pair of sub-complete forewings (Fig. 1, and figs. S1A and B, S2C–F, and S4K and L) demonstrates that variation in the number and branching pattern of RP, M, and CuA+CuPa occur at the intra-specific level. More important variations are (i) the connection, or lack thereof, of an anterior veinlet from RP with RA, (ii) the connection, or lack thereof, of an anterior branch of MA with RP, and (iii) the connection of an anterior branch of CuA+CuPa with MP. As for (i), the set of specimens covers the complete range of variation, suggesting that it is not a character suitable to delimit species. Moreover, a similar range of variation has already been documented in *Lon. loculata* and *Miamia* spp. As for (ii), again, the set of specimens covers the complete range of variation of the character, with ‘an anterior branch of MA and RP distinct’ (figs. S3C and D, and S5K and L), ‘an anterior branch of MA and RP connected by a short cross-vein’ (Fig. 1, and figs. S2C and D, and S5A and B), ‘an anterior branch of MA and RP briefly connected’ (fig. S5I and J), and ‘an anterior branch of MA and RP fused for some distance’ (fig. S3A and B). Again, the same range of variation has been documented in *Lon. loculata* and *M. maimai*. As for (iii), the trait is very rare (fig. S4A and B). Given the above and the variation documented in *Lon. loculata*, it is of very minor relevance. In summary, observed differences in forewing venation are not sufficient to distinguish distinct species.

We assign several isolated hind wings, specifically the specimens CNU-NX1-199 (fig. S6E and F) and CNU-NX1-753 (fig. S6G and H) to *Ct. frequens* because they share the same size and the distinctive coloration of *Ct. frequens* hind wings, as documented from the holotype (Fig. 1) and other specimens preserving both fore- and hind wing, specifically CNU-NX1-752 (fig. S2A and B), CNU-NX1-738 (fig. S2C and D), CNU-NX1-731 (fig. S3E and F), CNU-NX1-747 (fig. S4A and B) and CNU-NX1-198 (fig. S6A and B). The specimen



CNU-NX1-764 (Fig. 3C and D) is an isolated head. Compared with other species occurring at Xiaheyan, it can be confidently assigned to *Ct. frequens* based on its size, shape, and features of the mandibles. The specimens CNU-NX1-749 (fig. S6A–E), CNU-NX1-756 (fig. S6F–H), CNU-NX1-754 (fig. S6I–K) and CNU-NX1-742 (fig. S7A–C) can be confidently assigned to *Ct. frequens* based on size, wing venation and coloration, rectangular prothorax and/or long ovipositor.

## 2.2 Ovipositor comparative analysis

This section complements schematic reconstructions provided in Fig. 2. Schemes representative of Grylloidea, Gryllacrididae and Anostomatidae were derived from previous accounts (12–14).

### 2.2.1 *Grylloblatta chandleri* Kamp, 1963 (schematized under ‘Grylloblattodea’ in Fig. 2G)

Our observations corroborate previous accounts (15, 75), in particular regarding the occurrence of a long **olis1** connecting **gp9** and **gp8**. Its **rh** is slightly dejected externally. We also noticed the occurrence of an olistheter interlocking left and right **gp9** along their dorsal margins. A specimen we observed had an egg engaged in the ovipositor. Due to the large diameter of the egg **olis1** unlocked, as well as the dorsal **gp9–gp9** olistheter. It can then be assumed that olistheteres are comparatively labile structures in the species. In resting position (i.e. without engaged egg), when viewed externally, the ventral part of **gp9** is not concealed by **gp9**. Most of the area of **gp9** concealed by **gs9** is not as strongly sclerotized as its ventral part, except for the very base and its dorsal, ventral and apical margins.

### 2.2.2 *Anacridium aegyptium* (Linnaeus, 1764) (schematized under ‘Caelifera’ in Fig. 2G)

Our observations corroborate previous accounts on other caeliferan species reporting the occurrence of an **olis1** connecting **gp9** and **gp8** along the entire ventral edge of the former (14, 16). Unlike reported by Ander (57), we found no evidence of an olistheter interlocking the ‘inner’ (i.e. **gp9**) and ‘posterior’ (i.e. **gs9**) valves (i.e. **olis2**). The **gp8** and Ander’s (57) ‘lateral basivalvular sclerite’ are extensively fused: they share the same lumen, and the dorsal and ventral fusion points are conspicuous in cross-section, owing to a clear invagination, coupled to a substantial and well-delimited thickening, of their shared wall.

### 2.2.3 *Ceuthophilus* sp. (Fig. 2E and F; schematized under ‘Rhaphidophoridae’ in Fig. 2G)

We concur with previous accounts reporting that **olis2** occurs in this genus and in other Rhaphidophoridae (12, 14, 76). Unlike other orthopterans, the **rh** of **olis2** is a short projection directed posteriorly, while its **al** covers a broader range (as it is, the antero-ventral half of **gp9**). Viewed laterally, the **al** of **olis2** is slightly convex. This configuration possibly provides some degree of rotational freedom to **gs9** vs. **gp9** & **gp8** (interlocked by **olis1**, which extends more posteriorly than **olis2**, including its **rh**), using the **rh** of **olis2** as a slightly movable axis. This supposed ability would allow **gp8** postero-ventral teeth to be exposed (instead of concealed by **gs9**) and then used by the insect to appreciate the adequacy of substrate for oviposition. The **gp8** is only partially concealed by **gs9**.



## 2.2.4 *Tettigonia viridissima* (Linnaeus, 1758) (schematized under ‘Tettigoniidae’ in Fig. 2G)

The observed configuration of the ovipositor valves conforms that described by Cappe de Baillon (12). Unlike assumed by Kluge (14; among others) we argue that the olistheter interlocking **gs9** and **gp8** (thereafter **olis3**) is not homologous with **olis2**. Firstly, a protrusion from **gs9** and directed towards **gp9** (viz., the characteristic features of **olis2**) occurs at various levels along the ovipositor. It is clearly distinct from another well-delimited olistheter (viz. **olis3**). Secondly, as stated by Kluge (14), the Anostostomatidae possibly represent an ‘intermediate’ stage in which a well-delimited **olis2** co-occurs with the premises of an **olis3**, in the shape of a projection of the ventral margin of **gs9** into **gp8**. If two olistheteres occur (in addition to **olis1**), they cannot be homologous. It follows that there is an **olis3** besides **olis2**.

## 2.3 Analysis of the mandibular mechanical advantage

Progression of mechanical advantage curves for the studied taxa are represented in fig. S9. Results of the PCA are summarized in tab. S3 and represented in fig. S10, including the phylogenetic PCA. Animated versions of the PCA represented in Fig. 3E are provided in the associated Dryad dataset (58).

## 3 Insect species currently known to occur at Xiaheyan

Palaeoptera (24 sp.)

Rostropalaeoptera (9 sp.)

Palaeodictyoptera (4 sp.)

*Namuroningxia elegans* Prokop & Ren, 2007

*Sinodunbaria jarmilae* Li, Ren, Pecharová & Prokop, 2013

*Xiaheyanella orta* Fu, Béthoux, Yand & Ren, 2015

*Tythospilaptera wangae* Liu, Béthoux, Yin & Ren, 2015

Megasecopteromorpha (5 sp.)

*Brodioptera sinensis* Pecharová, Ren & Prokop, 2015

*Sinopalaeopteryx splendens* Pecharová, Prokop & Ren, 2015

*Sinopalaeopteryx olivieri* Pecharová, Prokop & Ren, 2015

*Namuroptera minuta* Pecharová, Prokop & Ren, 2015

*Sinodiapha ramosa* Yang, Ren & Béthoux, 2020

Odonatoptera (6 sp.)

*Shenzhousia qilianshanensis* Zhang & Hong, 2006

*Oligotypus huangheensis* Ren, Nel & Prokop, 2008

*Tupus orientalis* (Zhang, Hong & Su, 2012)

*Erasipterella jini* (Zhang, Hong & Su, 2012)

*Aseripterella sinensis* Li, Béthoux, Pang & Ren, 2013

*Sylphalula laliquei* Li, Béthoux, Pang & Ren, 2013

Neoptera (17 sp.)

Dictyoptera (5 sp.)

*Qilianiblatta namurensis* Zhang, Schneider & Hong, 2013

*Kinklidoblatta youhei* Wei, Béthoux, Guo, Schneider & Ren, 2013

Undetermined sp.1

Undetermined sp.2

Undetermined sp.3

Grylloblattida (1 sp.)

*Sinomamuropteris ningxiaensis* Peng, Hong & Zhang, 2005

Plecoptera (1 sp.)

*Gulou carpenteri* Béthoux, Cui, Kondratieff, Stark & Ren, 2011

Archaeorthoptera (10 sp.)

*Sinopteron huangheense* Prokop & Ren, 2007

*Chenxiella liuae* Liu, Ren & Prokop, 2009

*Longzhua loculata* Gu, Béthoux & Ren, 2011

*Heterologus duyiwuer* Béthoux, Gu & Ren, 2012

*Miamia maimai* Béthoux, Gu, Yue & Ren, 2012

*Xixia huban* Gu, Béthoux & Ren, 2014

*Protomiamia yangi* Du, Béthoux, Gu & Ren, 2017

*Sinogerarus pectinatus* Gu, Béthoux & Ren, 2017

*Phtanomiamia gui* Chen, Ren & Béthoux, 2020

*Ctenoptilus frequens* sp. nov.

## SUPPLEMENTAL FIGURES

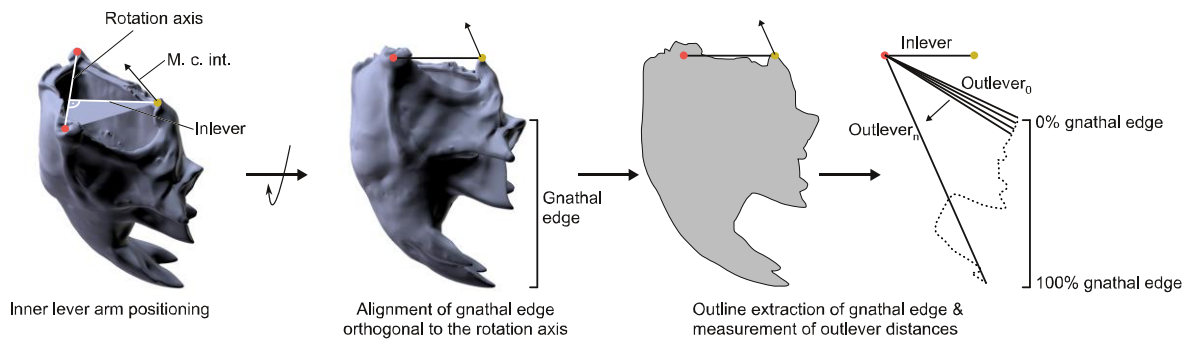

**Figure S1. Workflow for the extraction of the mandibular mechanical advantage based on 3D models.**

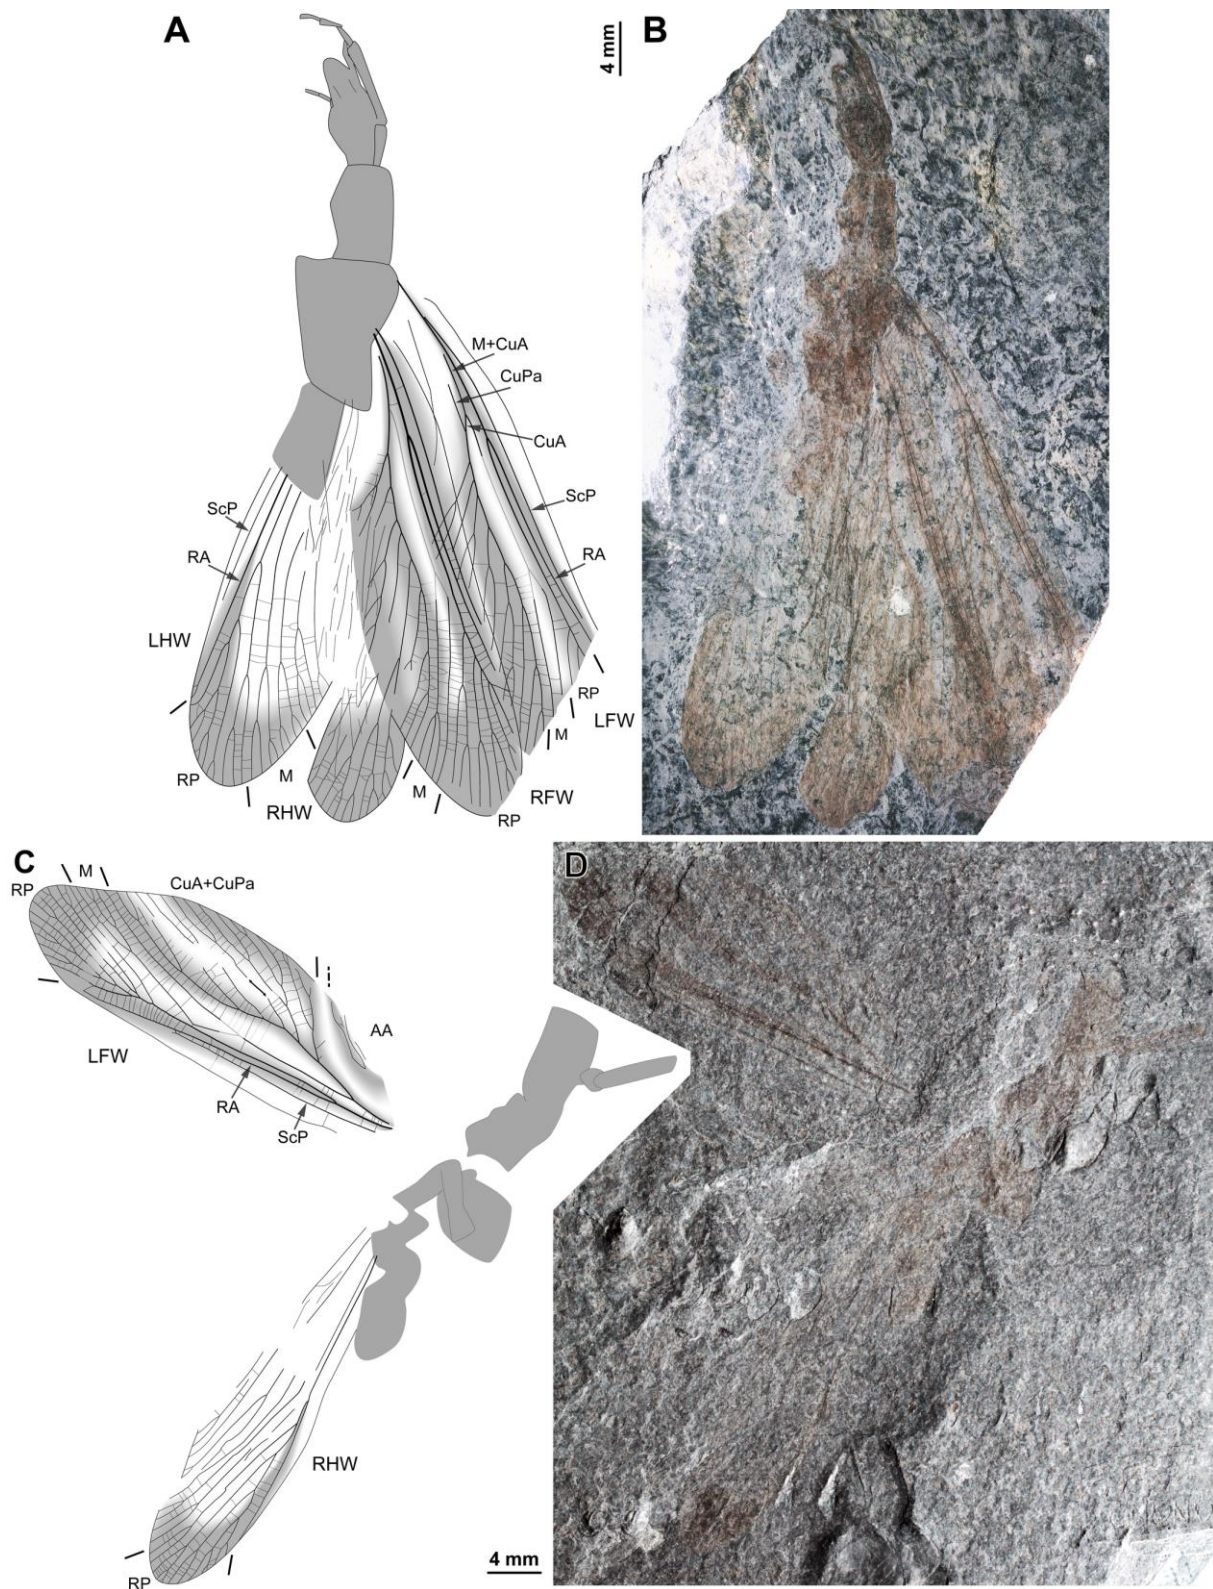

**Fig. S2.** *Ctenoptilus frequens* sp. nov., specimens composed of fore- and hind wings in connection with **body remains**. (A–B) Specimen CNU-NX1-752; habitus, left forewing as positive imprint and right forewing and hind wings as negative imprints, (A) drawing and (B) photograph (composite). (C–D) Specimen CNU-NX1-738; habitus, right hind wing as positive imprints and left forewing as negative imprints, (C) drawing and (D) photograph (composite; slightly shifted vertically with respect to drawing).



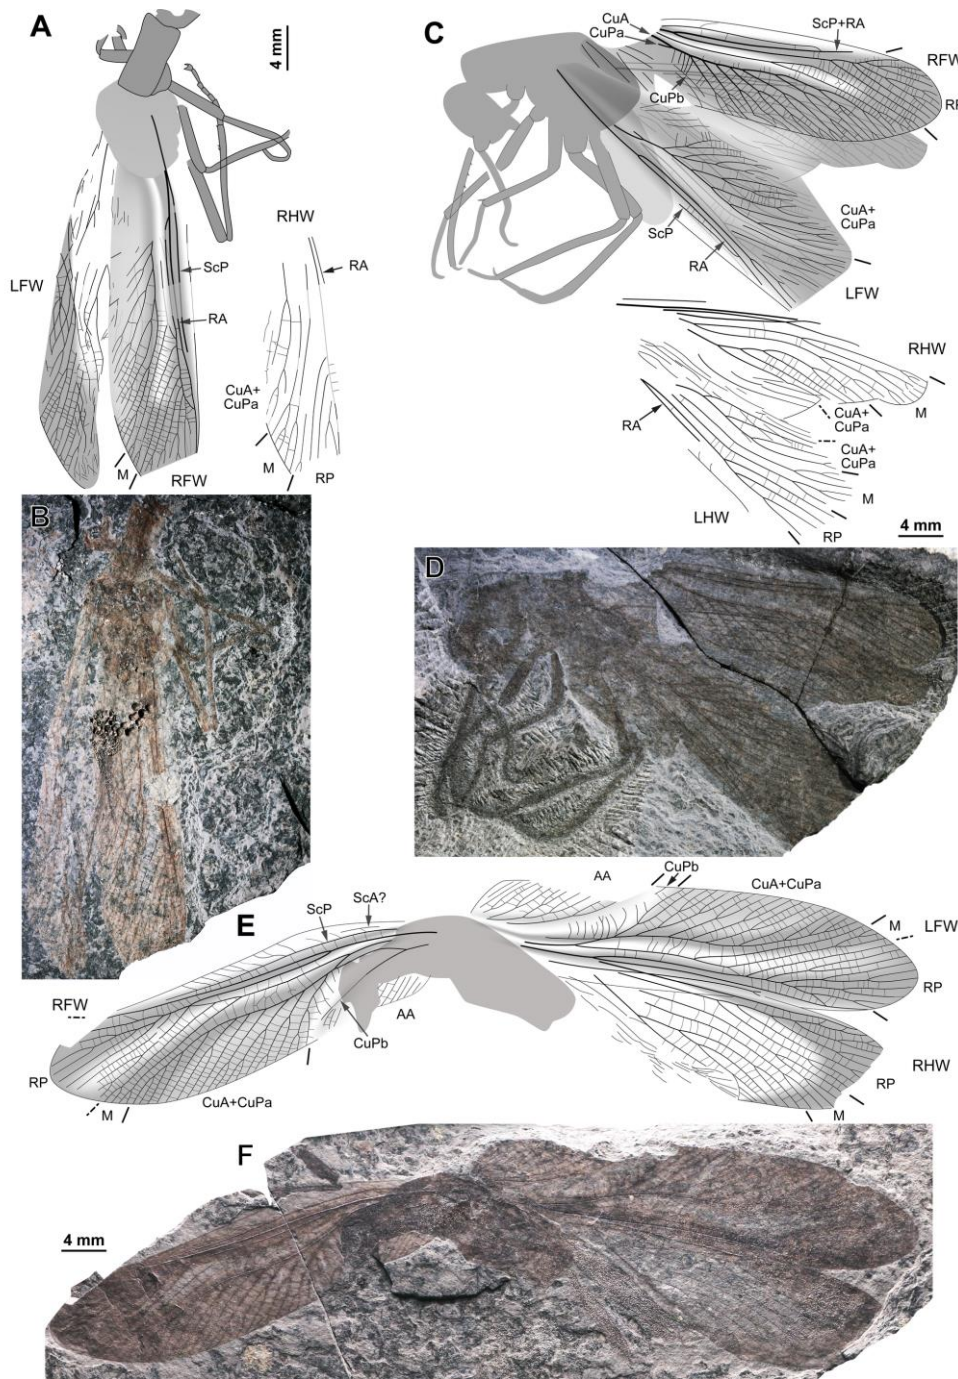

**Fig. S3 (preceding page).** *Ctenoptilus frequens* sp. nov., specimens composed of fore- and hind wings in connection with body remains. (A–B) Specimen CNU-NX1-759; habitus, left hind wing as positive imprint and right wings as negative imprints, (A) drawing (for clarity, drawing of right hind wing venation duplicated and relocated, original location in light grey on complete drawing) and (B) photograph (composite). (C–D) Specimen CNU-NX1-750; habitus, all wings as negative imprints, (C) drawing (for clarity, drawing of hind wings venation duplicated and relocated, original location in light grey on complete drawing) and (D) photograph (composite). (E–F) Specimen CNU-NX1-731; habitus, left forewing as positive imprint and right forewing and right hind wing as negative imprints, (E) drawing and (F) photograph (composite).



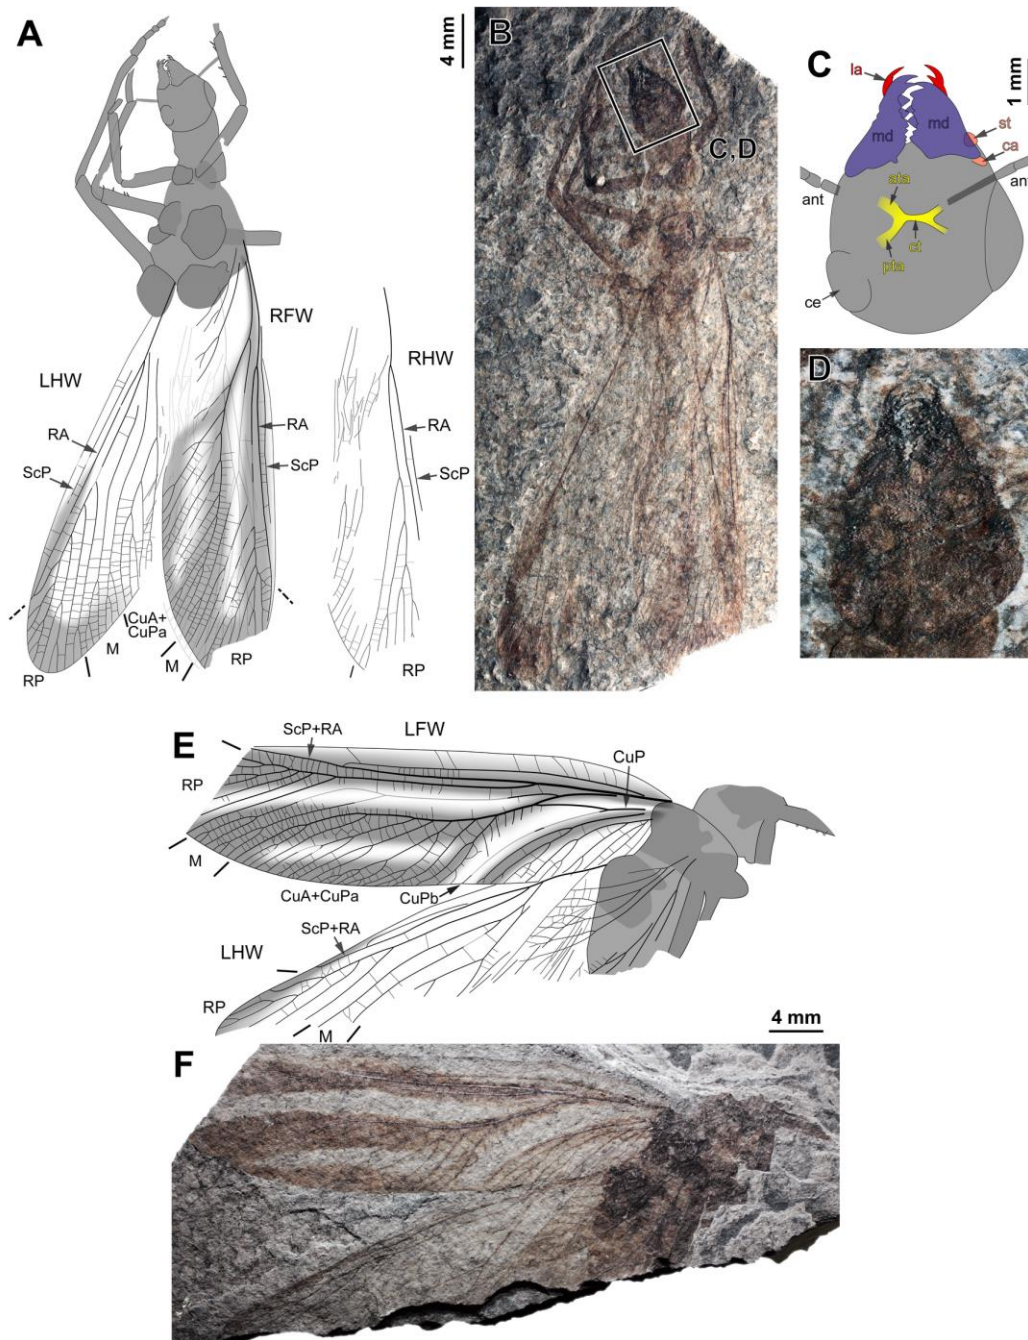

**Fig. S4.** *Ctenoptilus frequens* sp. nov., specimens composed of fore- and hind wings in connection with **body remains**. (A–D) Specimen CNU-NX1-747; (A–B) habitus, all wings as negative imprints, (A) drawing (for clarity, drawing of right hind wing venation duplicated and relocated, original location in light grey on complete drawing) and (B) photograph (composite); and (C–D) details of head (location as indicated in B), polarity unclear, (C) color-coded interpretative drawing and (D) photograph (composite). Color-coding: red, lacina (**la**); salmon, cardinal and stipital sclerites (**ca** and **st**, respectively); dark blue-purple, mandible (**md**); yellow, tentorium, including anterior tentorial arm (**ata**), posterior tentorial arm (**pta**) and corpotentorium (**ct**). Other indications: **ant**, antenna; **ce**, composite eye. (E–F) Specimen CNU-NX1-741; habitus, all wings as positive imprints, (E) drawing and (F) photograph (composite).



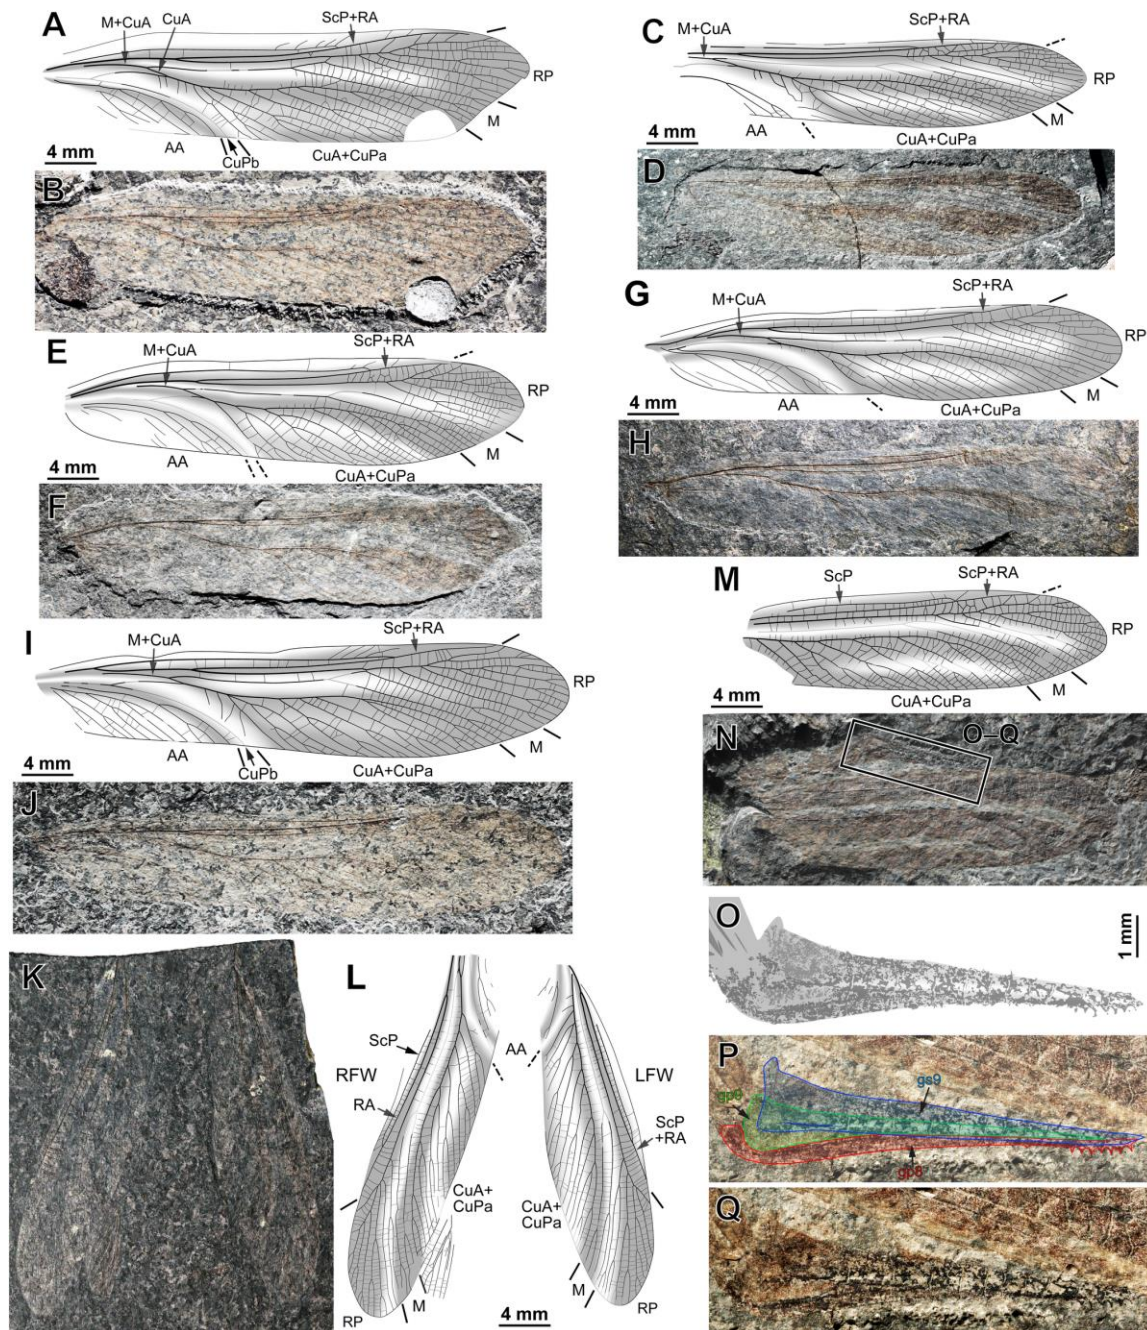

**Fig. S5 (preceding page).** *Ctenoptilus frequens* sp. nov., specimens composed of forewings, isolated or by pair, and forewing and ovipositor. (A–B) Specimen CNU-NX1-748; right forewing, negative imprint, (A) drawing and (B) photograph (composite, flipped horizontally, light-mirrored). (C–D) Specimen CNU-NX1-732; right forewing, positive imprint, (C) drawing and (D) photograph (composite). (E–F) Specimen CNU-NX1-757; right forewing, negative imprint, (E) drawing and (F) photograph (composite, flipped horizontally, light-mirrored). (G–H) Specimen CNU-NX1-758; left forewing, negative imprint, (G) drawing and (H) photograph (composite). (I–J) Specimen CNU-NX1-744; right forewing, negative imprint, (I) drawing and (J) photograph (composite, flipped horizontally, light-mirrored). (K–L) Specimen CNU-NX1-751; forewing pair, both as negative imprints, and apical fragment of a hind wing, (K) drawing and (L) photograph (composite). (M–Q) Specimen CNU-NX1-743; (M–N) habitus, right forewing, positive imprint, (M) drawing and (N) photograph (composite); and (O–Q) details of ovipositor (location as indicated in N), polarity unknown, (O) drawing and (P–Q) photographs, (P) with color-coded interpretative drawing and (Q) without (composite, flipped horizontally).



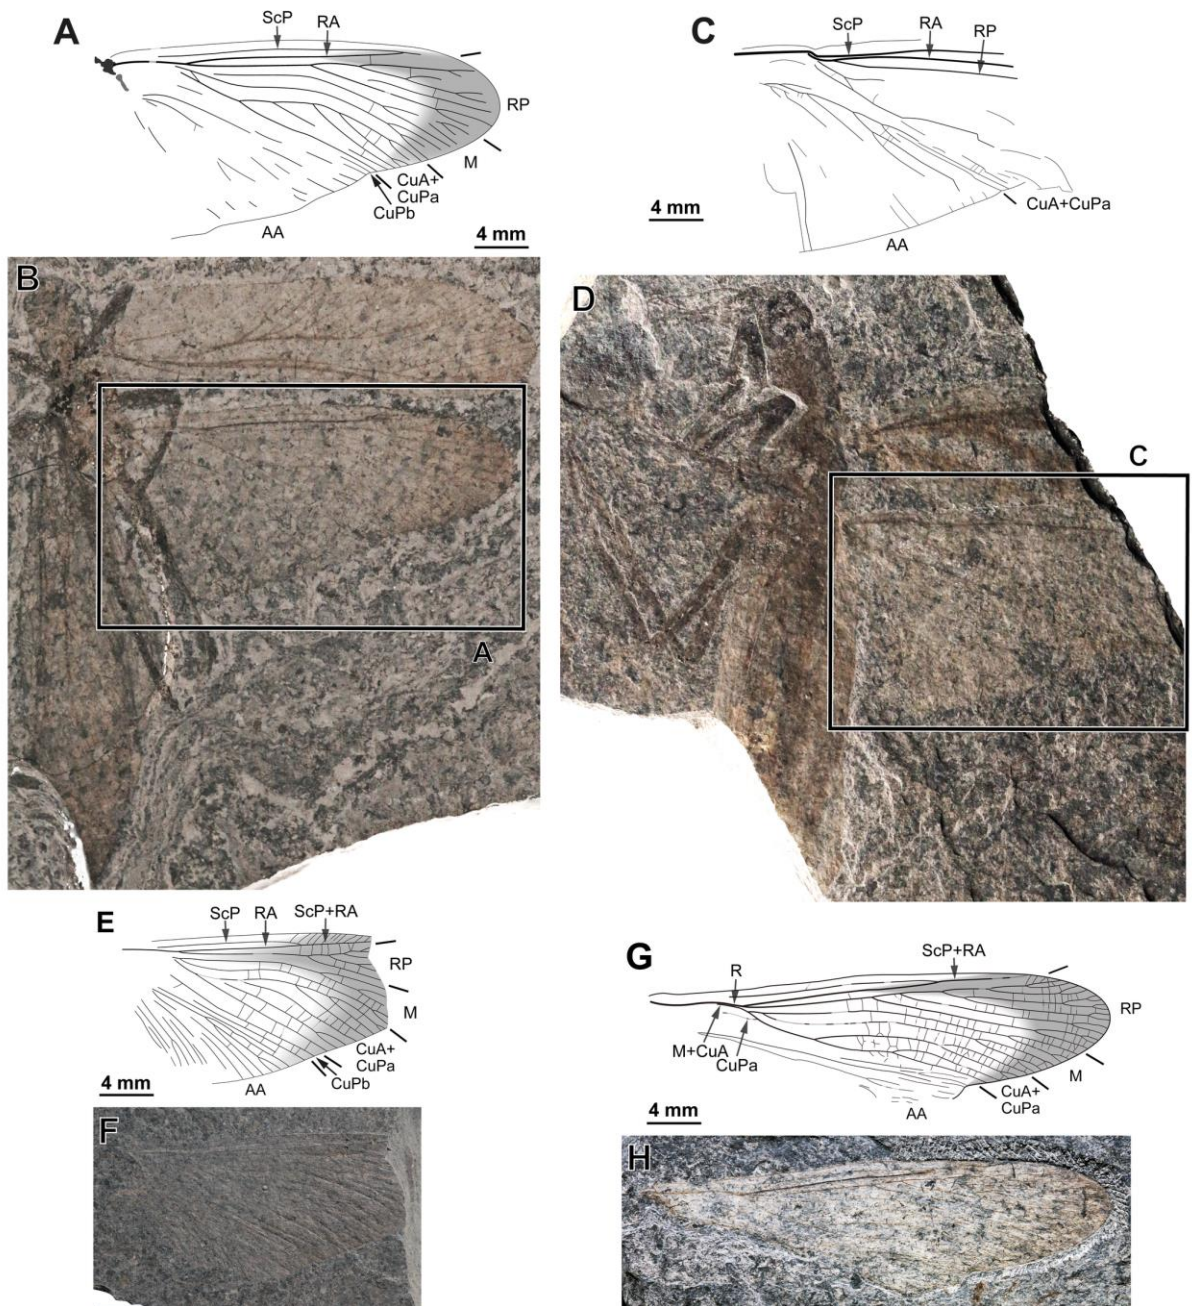

**Fig. S6. *Ctenoptilus frequens* sp. nov., specimens composed of well-exposed hind wings in connection with body remains or isolated.** (A–B) Specimen CNU-NX1-198; (A) drawing of right hind wing (location as indicated in B) and (B) photograph of habitus (composite, flipped horizontally), left forewing as positive imprints and left hind wing and right wings as negative imprints. (C–D) Specimen CNU-NX1-740; (C) drawing of right hind wing; (D) photograph for habitus (composite, flipped horizontally, light-mirrored), right wings as positive imprints. (E–F) Specimen CNU-NX1-199; right hind wing, positive imprint, (E) drawing and (F) photograph (composite). (G–H) Specimen CNU-NX1-753; left hind wing, negative imprint, (G) drawing and (H) photograph (composite).



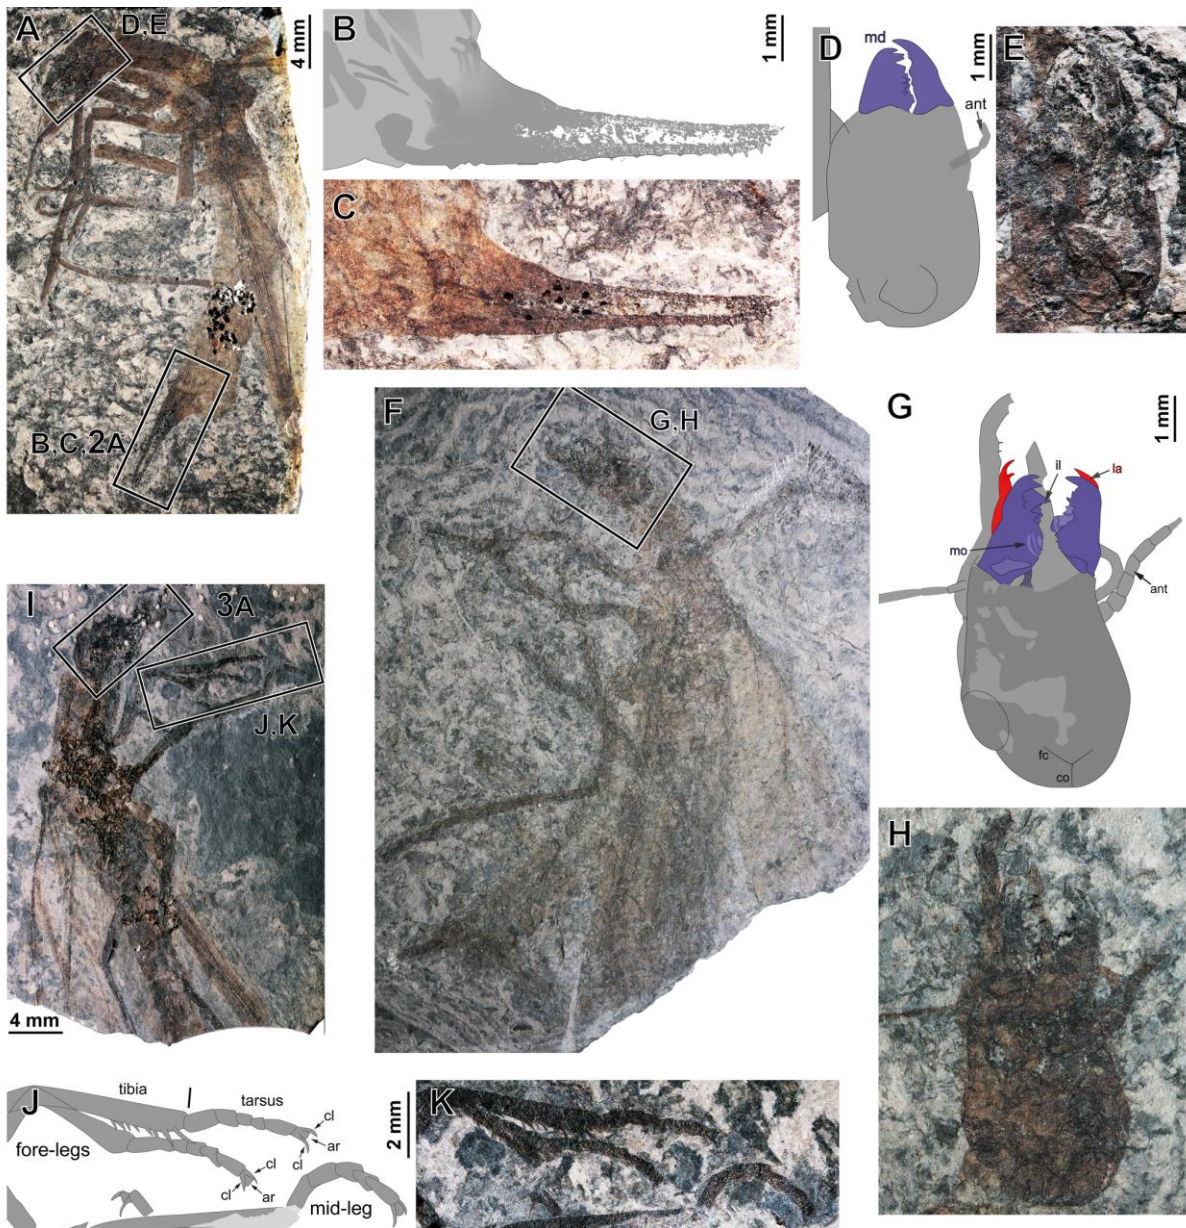

**Fig. S7. *Ctenoptilus frequens* sp. nov., specimens composed of body remains including well-preserved head, legs and/or ovipositor.** (A–E) Specimen CNU-NX1-749; (A) photograph of habitus (composite), left forewing as positive imprint; (B–C) details of ovipositor (location as indicated in A; to be compared with main document Fig. 2C), polarity unclear, (B) drawing and (C) photograph (composite); and (D–E) details of head (location as indicated in A), (D) color-coded interpretative drawing and (E) photograph (composite). (F–H) Specimen CNU-NX1-756; (F) photograph of habitus (composite); and (F–H) details of head (location as indicated in F), imprint polarity unclear, (G) color-coded interpretative drawing and (F) photograph (composite). (I–K) Specimen CNU-NX1-754; (I) photograph of habitus (composite; frame delimiting head indicating the location of main document Fig. 3A–B), (J–K) details of distal portions of fore-legs and a mid-leg (location as indicated in I), (J) drawing and (K) photograph (composite).



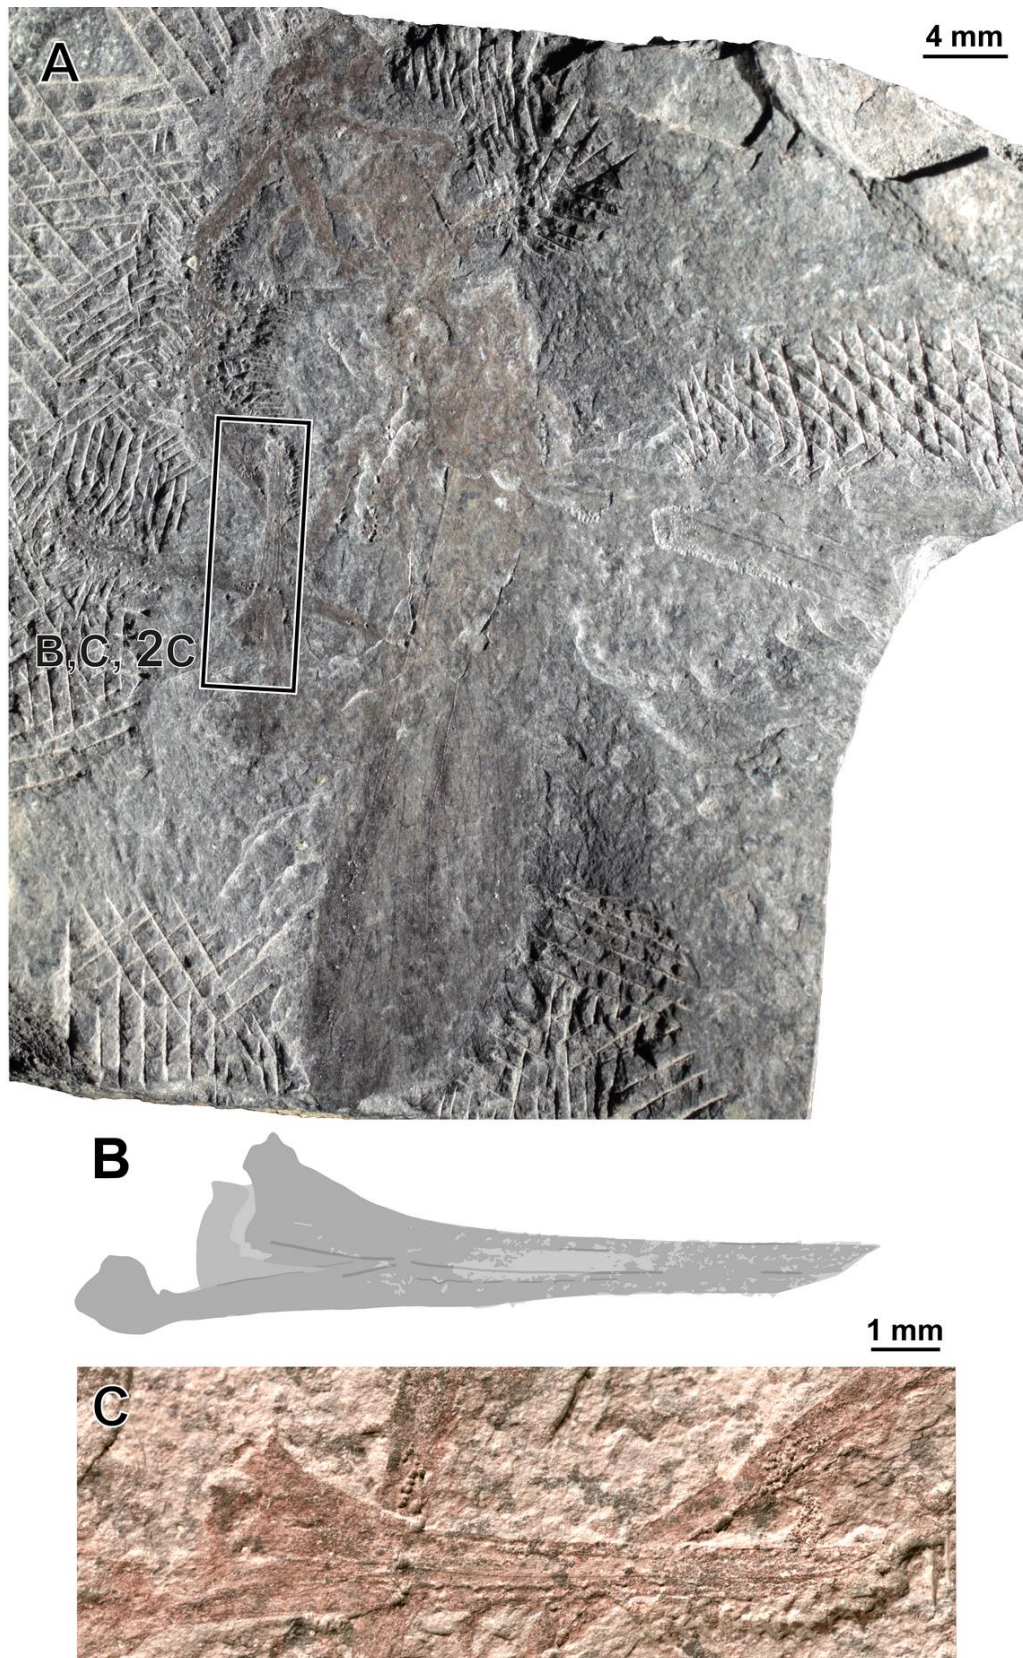

**Fig. S8.** *Ctenoptilus frequens* sp. nov., specimen CNU-NX1-742. (A) Photograph of habitus (composite), right forewing as positive imprint, flipped horizontally, and (B–C) details of ovipositor (location indicated in A; to be compared with main document Fig. 2E), (B) drawing and (C) photograph (light-mirrored).



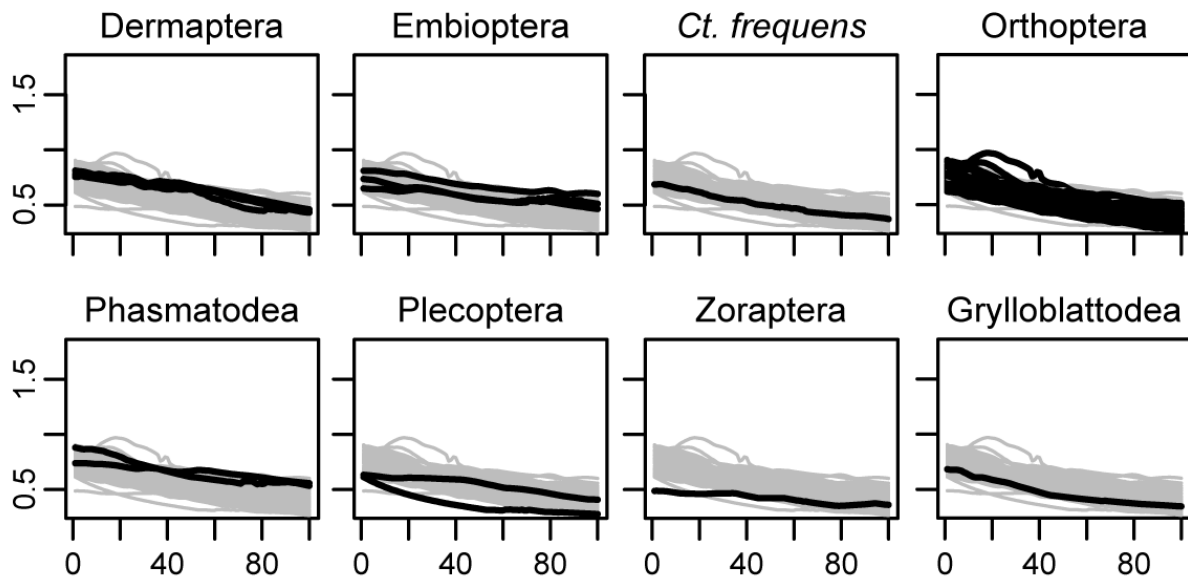

**Fig. S9.** Progression of mechanical advantage curves for the studied taxa. x-axis = % tooth row; y-axis=MA.

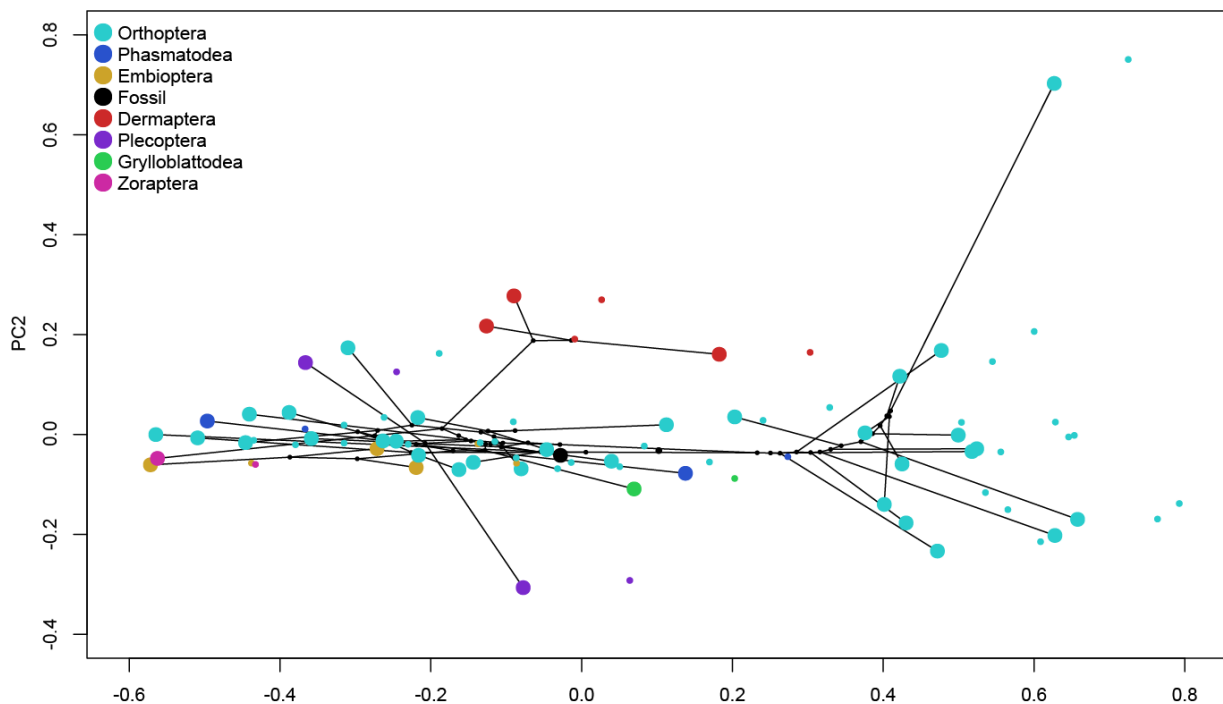

**Fig. S10.** Results of the principal component analysis of the mandibular mechanical advantage for the first two PCs together with results for the first two PCs after phylogenetic signal correction. Large dots, distribution of species in PC space uncorrected for phylogenetic signal; small dots, distribution of species in PC space corrected for phylogenetic signal. Although phylogenetic signal was significant, differences do not affect the relative position of the sampled species to each other in PC space.



| Order           | Species                             | Food preference |
|-----------------|-------------------------------------|-----------------|
| Dermaptera      | <i>Diplatys flavicollis</i>         | omnivore        |
| Dermaptera      | <i>Forficula auricularia</i>        | omnivore        |
| Dermaptera      | <i>Hemimerus</i> sp.                | carnivore       |
| Embioptera      | <i>Aposthonia japonica</i>          | herbivore       |
| Embioptera      | <i>Embia ramburi</i>                | herbivore       |
| Embioptera      | <i>Metoligotoma</i> sp.             | herbivore       |
| Grylloblattodea | <i>Grylloblatta bifratrilecta</i>   | omnivore        |
| Orthoptera      | <i>Acheta domesticus</i>            | omnivore        |
| Orthoptera      | <i>Comicus calcaris</i>             | omnivore        |
| Orthoptera      | <i>Conocephalus</i> sp.             | omnivore        |
| Orthoptera      | <i>Myrmecophilus</i> sp.            | omnivore        |
| Orthoptera      | <i>Gryllus bimaculatus</i>          | omnivore        |
| Orthoptera      | <i>Cyphoderris</i> sp.              | omnivore        |
| Orthoptera      | <i>Hemideina crassidens</i>         | omnivore        |
| Orthoptera      | <i>Meconema meridionale</i>         | carnivore       |
| Orthoptera      | <i>Papuaistus</i> sp.               | omnivore        |
| Orthoptera      | <i>Prosopogryllacris</i> sp.        | omnivore        |
| Orthoptera      | <i>Stenobothrus lineatus</i>        | herbivore       |
| Orthoptera      | <i>Stenopelmatus</i> sp.            | omnivore        |
| Orthoptera      | <i>Pholidoptera griseoptera</i>     | omnivore        |
| Orthoptera      | <i>Tettigonia viridissima</i>       | omnivore        |
| Orthoptera      | <i>Tridactylus</i> sp.              | herbivore       |
| Orthoptera      | <i>Troglophilus neglectus</i>       | omnivore        |
| Orthoptera      | <i>Xya variegata</i>                | detrivore       |
| Phasmatodea     | <i>Agathemera</i> sp.               | herbivore       |
| Phasmatodea     | <i>Peruphasma schultei</i>          | herbivore       |
| Plecoptera      | <i>Eusthenia lacustris</i>          | carnivore       |
| Plecoptera      | <i>Perla marginata</i>              | carnivore       |
| Zoraptera       | <i>Zorotypus caudelli</i>           | herbivore       |
| Orthoptera      | <i>Ctenophilus rapax</i> CFMR       | tested          |
| Orthoptera      | <i>Ametrosomus</i> sp.              | omnivore        |
| Orthoptera      | <i>Ametrus tibialis</i>             | omnivore        |
| Orthoptera      | <i>Apotrechus illawarra</i>         | omnivore        |
| Orthoptera      | <i>Bothriogryllacris brevicauda</i> | omnivore        |
| Orthoptera      | <i>Chauliogryllacris grahami</i>    | omnivore        |
| Orthoptera      | <i>Cnemotettix bifasciatus</i>      | omnivore        |
| Orthoptera      | <i>Cooraboorama canberrae</i>       | omnivore        |
| Orthoptera      | <i>Kinermania ambulans</i>          | omnivore        |
| Orthoptera      | <i>Mooracra</i> sp.                 | omnivore        |
| Orthoptera      | <i>Nullanullia maitlia</i>          | omnivore        |
| Orthoptera      | <i>Nunkeria brochis</i>             | omnivore        |
| Orthoptera      | <i>Paragryllacris combusta</i>      | omnivore        |
| Orthoptera      | <i>Pararemus</i> sp.                | omnivore        |
| Orthoptera      | <i>Wirritina brevipes</i>           | omnivore        |

**Table S2. Food preference of polyneopteran species included in the MA Principal Component Analyses.**

**Principal Component Analysis uncorrected for phylogenetic signal**

|                               | <b>PC1</b> | <b>PC2</b> | <b>PC3</b> | <b>PC4</b> | <b>PC5</b> | <b>PC6</b> |
|-------------------------------|------------|------------|------------|------------|------------|------------|
| <b>Standard deviation</b>     | 0.3804     | 0.1576     | 0.0829     | 0.0612     | 0.0387     | 0.0250     |
| <b>Proportion of Variance</b> | 0.7939     | 0.1363     | 0.0377     | 0.0205     | 0.0082     | 0.0034     |
| <b>Cumulative Proportion</b>  | 0.7939     | 0.9302     | 0.9678     | 0.9884     | 0.9966     | 1.0000     |

**Principal Component Analysis corrected for phylogenetic signal**

|                               | <b>PC1</b> | <b>PC2</b> | <b>PC3</b> | <b>PC4</b> | <b>PC5</b> | <b>PC6</b> |
|-------------------------------|------------|------------|------------|------------|------------|------------|
| <b>Standard deviation</b>     | 0.7452     | 0.3676     | 0.1724     | 0.1308     | 0.0986     | 0.0547     |
| <b>Proportion of Variance</b> | 0.7404     | 0.1802     | 0.0396     | 0.0228     | 0.0130     | 0.0040     |
| <b>Cumulative Proportion</b>  | 0.7404     | 0.9206     | 0.9602     | 0.9830     | 0.9960     | 1.0000     |

**Table S3. Importance of components of Principal Component Analyses of MA.**
